# Supplementary material for: A benzofuran[b]-fused BODIPY as an efficient sensitizer for photocatalytic hydrogen production
Source: Royal Society of Chemistry journal article supplement (doi:10.1039/d1se00387a), 2021-01-01
Supplement: d1se00387a1.pdf [file d1se00387a1.pdf]

## Electric Supporting Information

### A benzofuran[b]-fused BODIPY as an efficient sensitizer for photocatalytic hydrogen production

Ko Makino,<sup>1</sup> Takuro I<sup>1</sup> and Yuji Kubo\*<sup>1,2</sup>

<sup>1</sup>*Department of Applied Chemistry for Environment, Graduate School of Urban Environmental Sciences, Tokyo Metropolitan University, 1-1 Minami-Osawa, Hachioji, Tokyo, 192-0397, Japan.*

<sup>2</sup>*Research Center for Hydrogen Energy-based Society, Tokyo Metropolitan University, 1-1 Minami-Osawa, Hachioji, Tokyo, 192-0397, Japan*

#### Table of contents

|                                                                                                                                                                                                                     |         |
|---------------------------------------------------------------------------------------------------------------------------------------------------------------------------------------------------------------------|---------|
| Synthesis of <b>1</b> and <b>2</b> .....                                                                                                                                                                            | S2 – S4 |
| Fig. S1. Cyclic voltammogram of ascorbic acid in several pH containing phosphate buffer solution .....                                                                                                              | S5      |
| Table S1. Theoretical data for compound <b>1</b> . (Calculated by B3LYP/6-31G(d,p) level using Gaussian 16W).....                                                                                                   | S5      |
| Fig. S2. Normalized absorption (blue solid line) and fluorescence (dashed line) spectra of <b>1</b> and <b>2</b> . .....                                                                                            | S5      |
| Fig. S3. HAADF-STEM images of Pt/P25.....                                                                                                                                                                           | S6      |
| Fig. S4. UV-vis absorption spectrum of electrolyte after 30 h photocatalysis using P25/Pt/ <b>1</b> . .....                                                                                                         | S6      |
| Fig. S5. Photographs of P25/Pt/ <b>1</b> before (left) and after (right) 30 h-photoirradiation. ....                                                                                                                | S6      |
| Fig. S6. Photographs of P25/Pt/ <b>2</b> before (left) and after (right) 10 h-photoirradiation. ....                                                                                                                | S7      |
| Fig. S7. Cycling test of H <sub>2</sub> evaluation for Pt/P25/ <b>1</b> in the presence of ascorbic acid in phosphate buffer (pH 7.0) under 100 mW cm <sup>-2</sup> light irradiation ( $\lambda > 400$ nm) . ..... | S7      |
| Fig. S8. Liner sweep voltammetry of FTO/P25/ <b>1</b> and FTO/P25/ <b>2</b> with and without photoirradiation. ....                                                                                                 | S7      |
| Table S2. Photoluminescence decay profiles of <b>1</b> in the presence and absence of ascorbic acid in MeOH. ....                                                                                                   | S7      |
| Fig. S9. <sup>1</sup> H NMR spectrum of <b>5</b> .....                                                                                                                                                              | S8      |
| Fig. S10. <sup>1</sup> H NMR spectrum of <b>6</b> .....                                                                                                                                                             | S9      |
| Fig. S11. <sup>1</sup> H NMR spectrum of <b>7</b> .....                                                                                                                                                             | S10     |
| Fig. S12. <sup>1</sup> H NMR spectrum of <b>9</b> .....                                                                                                                                                             | S11     |
| Fig. S13. <sup>1</sup> H NMR spectrum of <b>11</b> .....                                                                                                                                                            | S12     |
| Fig. S14. <sup>1</sup> H NMR spectrum of <b>1</b> .....                                                                                                                                                             | S13     |
| Fig. S15. <sup>1</sup> H NMR spectrum of <b>2</b> .....                                                                                                                                                             | S14     |
| Fig. S16. <sup>13</sup> C NMR spectrum of <b>5</b> .....                                                                                                                                                            | S15     |
| Fig. S17. <sup>13</sup> C NMR spectrum of <b>6</b> .....                                                                                                                                                            | S16     |
| Fig. S18. <sup>13</sup> C NMR spectrum of <b>7</b> .....                                                                                                                                                            | S17     |
| Fig. S19. <sup>13</sup> C NMR spectrum of <b>9</b> .....                                                                                                                                                            | S18     |
| Fig. S20. <sup>13</sup> C NMR spectrum of <b>11</b> .....                                                                                                                                                           | S19     |
| Fig. S21. <sup>13</sup> C NMR spectrum of <b>1</b> .....                                                                                                                                                            | S20     |
| Fig. S22. <sup>13</sup> C NMR spectrum of <b>2</b> .....                                                                                                                                                            | S21     |
| Fig. S23. High resolution of APCI mass spectrum of <b>5</b> .....                                                                                                                                                   | S22     |
| Fig. S24. High resolution of APCI mass spectrum of <b>6</b> .....                                                                                                                                                   | S23     |
| Fig. S25. High resolution of APCI mass spectrum of <b>7</b> .....                                                                                                                                                   | S24     |
| Fig. S26. High resolution of APCI mass spectrum of <b>9</b> .....                                                                                                                                                   | S25     |
| Fig. S27. High resolution of APCI mass spectrum of <b>11</b> .....                                                                                                                                                  | S26     |
| Fig. S28. High resolution of APCI mass spectrum of <b>1</b> .....                                                                                                                                                   | S27     |
| Fig. S29. High resolution of APCI mass spectrum of <b>2</b> .....                                                                                                                                                   | S28     |

## Synthesis of 1 and 2

**Ethyl 3-(4-bromophenyl)-5-phenyl-1H-pyrrole-2-carboxylate (5):** To a solution of **3** (17.7 g, 61.6 mmol) in EtOH (300 mL) was added ethyl nitroacetate **4** (6.8 mL, 61.6 mmol) and Et<sub>3</sub>N (0.85 mL, 6.16 mmol). The resultant mixture was refluxed overnight. After the reaction, it was extracted EtOAc and water. The organic layer was dried with Na<sub>2</sub>SO<sub>4</sub> and was evaporated. The residue was chromatographed on silica gel (Wakogel C-300) using benzene and hexane (3:1 v/v) to give 25.4 g of Michael adduct (FAB-MS :  $m/z = 420 [M+H]^+$ ,  $422[M+2+H]^+$ ) quantitatively, being then dissolved in dry EtOH (180 mL). To the solution was added formamidine sulfinic acid (22.9 g, 212 mmol). The resultant mixture was refluxed overnight. After the reaction, resultant solid was filtered off and washed with water. In this way, 5.2 g of **5** was obtained in 23% yield.

<sup>1</sup>H NMR (500 MHz, CDCl<sub>3</sub>):  $\delta$  (ppm), 1.28 (3H, t,  $J = 7.08$  Hz), 4.29 (2H, q,  $J = 7.11$  Hz), 6.59 (1H, d,  $J = 3.10$  Hz), 7.34 (1H, tt,  $J = 7.42, 1.38$  Hz), 7.44 (2H, tt,  $J = 7.72, 1.60$  Hz), 7.48 (2H, dt,  $J = 8.70, 2.04$  Hz), 7.51 (2H, dt,  $J = 8.65, 2.02$  Hz), 7.57–7.60 (2H, m), 9.30 (1H, s); <sup>13</sup>C NMR (126 MHz, CDCl<sub>3</sub>)  $\delta$  (ppm) ; 160.9, 135.5, 134.0, 132.2, 131.2, 130.9, 130.8, 129.2, 129.2, 128.8, 121.2, 118.6, 109.7, 60.5, 14.3. HRMS (APCI): calcd for C<sub>19</sub>H<sub>16</sub>BrNO<sub>2</sub>, 370.0437, 344.0418, found 370.0431 [M + H]<sup>+</sup>, 372.0412 [M+H+2]<sup>+</sup>.

**3-(4-Bromophenyl)-5-phenyl-1H-pyrrole-2-carboxylic acid (6):** To a solution of **5** (5.18 g, 14.0 mmol) in EtOH (370 mL) was added 2M NaOH aqueous solution (95 mL). The resultant solution was refluxed for 2 h. After the reaction, adding 35% HCl aqueous solution caused solidification that was filtered off and washed with water. 3.2 g of **6** was obtained in 68% yield.

<sup>1</sup>H NMR (500 MHz, DMSO-*d*<sub>6</sub>):  $\delta$  (ppm), 6.76 (1H, d,  $J = 2.70$  Hz), 7.28 (1H, tt,  $J = 7.40, 1.34$  Hz), 7.39 (2H, tt,  $J = 7.72, 1.53$  Hz), 7.52 (2H, dt,  $J = 8.85, 2.00$  Hz), 7.55 (2H, dt,  $J = 8.75, 1.98$  Hz), 7.80–7.90 (2H, m), 11.9 (1H, s), 12.5 (1H, s). <sup>13</sup>C NMR (126 MHz, DMSO-*d*<sub>6</sub>)  $\delta$  (ppm) , 161.8, 135.3, 134.7, 131.4, 131.0, 130.6, 130.4, 128.6, 127.3, 125.3, 119.8, 119.3, 109.6. HRMS (APCI): calcd. for C<sub>17</sub>H<sub>12</sub>BrNO<sub>2</sub>, 342.0124, 344.0104. found 342.0117 [M + H]<sup>+</sup>, 344.0095 [M + H+2]<sup>+</sup>

**3-(4-Bromophenyl)-5-phenyl-1H-pyrrole-2-carbaldehyde (7):** Compound **6** (7.5 g, 21.9 mmol) was dissolved in CF<sub>3</sub>COOH (180 mL) under N<sub>2</sub> atmosphere and resultant solution was stirred at 50 °C for 30 min. After adding trimethyl orthoformate (40 mL, 766 mmol) into the solution, the mixture was stirred at 50 °C over night. And then the reaction solution was neutralized with NaHCO<sub>3</sub> aqueous solution and extracted with dichloromethane. The organic phase was dried with Na<sub>2</sub>SO<sub>4</sub> and evaporated. The residue was chromatographed on silica gel (Wakogel C-300) using dichloromethane as eluent to give 4.17 g of **7** in 57% yield.

<sup>1</sup>H NMR (500 MHz, CDCl<sub>3</sub>):  $\delta$  (ppm) 6.70 (1H, d,  $J = 2.80$  Hz), 7.38–7.43 (3H, m), 7.47 (2H, tt,  $J = 7.58, 1.62$  Hz), 7.60 (2H, dt,  $J = 8.40, 2.19$ Hz), 7.62–7.64 (2H, m), 9.50 (1H, br), 9.61 (1H, s). <sup>13</sup>C NMR (126 MHz, CDCl<sub>3</sub>)  $\delta$  (ppm) 178.9, 139.0, 136.8, 132.4, 132.0, 130.6, 130.6, 130.2, 129.3, 129.1, 129.0, 125.3, 122.3, 108.9. HRMS (APCI): calcd. for C<sub>17</sub>H<sub>12</sub>BrNO, 326.0175, 328.0155. found 326.0169 [M + H]<sup>+</sup>, 328.0152 [M+H+2]<sup>+</sup>.

**Difluoroboron chlated 2-(Z)-((3-(4-bromophenyl)-5-phenyl-1H-pyrrol-2-yl)methylele)-1H-benzofuro[3,2-*b*]pyrrole (9):** After a solution of 1H-benzofuro[3,2-*b*]pyrrole-2-carboxylic acid **8** (1.10 g, 5.47 mmol) was stirred at 50 °C for 40 min, **7** (1.80 g, 5.52 mmol) and POCl<sub>3</sub> (30 mL, 329 mmol) was added to the solution and resultant

mixture was stirred for 3 h. After quenching the reaction by adding saturated NaHCO<sub>3</sub> aqueous solution, the resultant solution was partitioned between water and dichloromethane. The organic phase was dried with Na<sub>2</sub>SO<sub>4</sub> aqueous solution and was evaporated to give solid that was then dissolved in dry dichloromethane (240 mL). To the solution were added Et<sub>3</sub>N (8.2 mL, 59 mmol) and BF<sub>3</sub>·Et<sub>2</sub>O (11 mL, 88 mmol) under N<sub>2</sub> atmosphere. The mixture was stirred for 6 h. After quenching the reaction by adding saturated NaHCO<sub>3</sub> aqueous solution, the resultant solution was extracted with dichloromethane and water. The organic phase was dried with Na<sub>2</sub>SO<sub>4</sub> aqueous solution and then evaporated. The residue was washed with water and chromatographed on silica gel (Wakogel C-300) using dichloromethane and hexane (2:3 v/v) as eluent to give 1.20 g of **9** in 42% yield.

<sup>1</sup>H NMR (500 MHz, CDCl<sub>3</sub>): δ (ppm) 6.62 (1H, s), 6.73 (1H, s), 7.29–7.32 (2H, m), 7.41–7.44 (3H, m), 7.47 (1H, ddd, *J* = 7.75, 7.12, 1.32 Hz), 7.50–7.55 (3H, m), 7.65 (2H, dt, *J* = 9.05, 2.18 Hz), 8.01–8.04 (2H, m), 8.08 (1H, d, *J* = 7.55 Hz, H<sub>a</sub>). <sup>13</sup>C NMR (126 MHz, CDCl<sub>3</sub>) δ (ppm) 164.8, 158.3, 132.3, 132.2, 132.1, 130.7, 130.4, 130.4, 130.0, 129.5, 128.4, 128.2, 124.3, 124.2, 123.3, 116.8, 112.8, 103.6. HRMS (APCI): calcd for C<sub>27</sub>H<sub>16</sub>BBF<sub>2</sub>N<sub>2</sub>O, 512.0506, 514.0484. found 512.0531 [M]<sup>+</sup>, 514.0525 [M+2]<sup>+</sup>.

**Difluoroboron chlated 2-(Z)-((3-(4-formylphenyl)-5-phenyl-1H-pyrrol-2-yl)methylene)-1H-benzofuro[3,2-b]pyrrole (11):** To a solution of **9** (1.2 g, 2.3 mmol) and 2-(4,4,5,5-tetramethyl-1,3,2-dioxaborolan-2-yl)-3-hexylthiophene-5-carbaldehyde **10** (1.9 g, 5.8 mmol) in dry THF (80 mL) were added 2.0 M K<sub>2</sub>CO<sub>3</sub> aqueous solution (23 mL). The resultant solution was degassed by three freeze–pump–thaw cycles, then Pd(PPh<sub>3</sub>)<sub>4</sub> (0.78 g, 0.67 mmol) was added to it. The mixture was refluxed overnight and then cooled to room temperature. After removing Pd, it was extracted with CH<sub>2</sub>Cl<sub>2</sub> and water. The organic phase was dried with Na<sub>2</sub>SO<sub>4</sub> and then evaporated. The residue was chromatographed on silica gel (Wakogel C-300) using benzene and hexane (4:1 v/v) as eluent to give 0.68 g of **11** in 47% yield.

<sup>1</sup>H NMR (500 MHz, CDCl<sub>3</sub>): δ (ppm) 0.88 (3H, t, *J* = 6.92 Hz), 1.24–1.31 (4H, m), 1.68 (2H, quint, *J* = 7.66 Hz), 2.75 (2H, t, *J* = 7.85 Hz), 6.64 (1H, s), 6.79 (1H, s), 7.31 (1H, ddd, *J* = 7.42, 6.95, 1.05 Hz), 7.42 (1H, s), 7.43 (1H, d, *J* = 8.00 Hz), 7.47 (1H, ddd, *J* = 7.75, 7.12, 1.30 Hz), 7.52–7.57 (3H, m), 7.61 (2H, dd, *J* = 6.38, 2.10 Hz), 7.65 (2H, dd, *J* = 8.35 Hz), 7.70 (1H, s), 8.04–8.06 (2H, m), 8.09 (1H, d, *J* = 7.65 Hz), 9.90 (1H, s). <sup>13</sup>C NMR (126 MHz, CDCl<sub>3</sub>) δ (ppm), 182.9, 165.1, 147.5, 144.5, 143.5, 141.7, 140.8, 138.6, 137.5, 137.4, 134.1, 133.7, 132.2, 130.7, 130.0, 129.8, 129.5, 129.5, 129.5, 129.3, 128.5, 128.4, 124.3, 124.2, 118.6, 116.8, 112.8, 103.6, 30.8, 30.5, 29.1, 28.9, 28.9, 28.7, 22.6, 22.5, 14.1, 14.0. HRMS (APCI): calcd for C<sub>38</sub>H<sub>31</sub>BF<sub>2</sub>N<sub>2</sub>O<sub>2</sub>S, 629.2247, found 629.2285 [M+H]<sup>+</sup>.

**Difluoroboron chlated 2-(Z)-((3-(1-(3-hexyl-5-(2-carboxy-2-cyanovinyl)thiophen))-2-yl)-phenyl-4-yl)-5-phenyl-1H-pyrrol-2-yl)methylene)-1H-benzofuro[3,2-b]pyrrole 1 ;** Under N<sub>2</sub> condition, a solution of **10** (1.09 g, 1.74 mmol), 2-cyanoacetic acid (0.355 g, 4.17 mmol) and ammonium acetate (0.383 g, 4.97 mmol) in acetic acid (100 mL) was refluxed for 2 h. After quenching with water, the solution was extracted with CH<sub>2</sub>Cl<sub>2</sub>. The organic layer was washed with water, dried with Na<sub>2</sub>SO<sub>4</sub> and evaporated. The residue was chromatographed on silica gel (Wakogel C-300) using a gradient of AcOH (0–0.5% v/v) in CH<sub>2</sub>Cl<sub>2</sub> as an eluent. Obtained solid was reprecipitated with THF/MeOH. In this way, 0.467 g of **1** was obtained with 39% yield.

<sup>1</sup>H NMR (500 MHz, DMSO-*d*<sub>6</sub>): δ (ppm) 0.84 (3H, t, *J* = 6.80 Hz), 1.23–1.33 (6H, m), 1.63 (2H, quint, *J* = 7.54 Hz), 2.76 (2H, t, *J* = 7.70 Hz), 7.19 (1H, s), 7.23 (1H, s), 7.45 (1H, t, *J* = 7.78 Hz), 7.55–7.63 (4H, m), 7.70 (1H, d,

$J = 8.35$  Hz), 7.73 (2H, dd,  $J = 6.45, 1.80$  Hz), 7.87–7.89 (2H, m), 8.02 (2H, s), 8.08 (2H, dt,  $J = 6.55, 1.72$  Hz), 8.49 (1H, s), 13.8 (1H, s).  $^{13}\text{C}$  NMR (126 MHz, THF- $d_8$ )  $\delta$  (ppm) 166.0, 163.9, 159.6, 155.4, 147.9, 146.6, 141.6, 141.2, 135.7, 134.9, 134.8, 133.4, 131.3, 130.6, 130.6, 130.6, 130.6, 130.5, 130.4, 130.4, 130.3, 129.0, 124.9, 124.7, 119.6, 117.9, 116.4, 113.5, 104.6, 100.4, 32.6, 31.5, 30.0, 29.3, 23.5, 14.4. HRMS (ESI-MS) : calcd for  $\text{C}_{41}\text{H}_{32}\text{BF}_2\text{N}_3\text{O}_3\text{S}$ , 695.2238, found 695.2244  $[\text{M}]^+$  ; Elemental analysis: Calc. For  $\text{C}_{41}\text{H}_{32}\text{BF}_2\text{N}_3\text{O}_3\text{S} \cdot 1.2 \text{H}_2\text{O}$ : C, 68.66; H, 4.83; N, 5.86, Found: C, 68.64; H, 4.50; N, 5.91

**Difluoroboron chlated (E)-2-cyano-3-(Z)-2-(3,5-dimethyl-1H-pyrrol-2-yl)ethylidene)-3,5-dimethyl-2H-pyrrol-4-yl)acrylic acid 2**; Under  $\text{N}_2$  condition, a solution of **12** (0.931 g, 3.37 mmol), 2-cyanoacetic acid (0.714 g, 8.40 mmol) and ammonium acetate (0.843 g, 10.9 mmol) in acetic acid (180 mL) was refluxed for 2 h. After quenching with water, the solution was separated between  $\text{CH}_2\text{Cl}_2$  and 1M HCl aqueous solution. The organic layer was dried with  $\text{Na}_2\text{SO}_4$  and evaporated. The residue was washed with  $\text{CH}_2\text{Cl}_2$ , solved in THF and chromatographed on silica gel (Wakogel C-300) using a gradient of AcOH (0–0.8% v/v) in  $\text{CH}_2\text{Cl}_2$  as an eluent. 0.351 g of **2** was obtained with 34% yield after washing with THF.

$^1\text{H}$  NMR (500 MHz, THF- $d_8$ ):  $\delta$  (ppm) 2.32 (1H, s), 2.42 (1H, s), 2.53 (1H, s), 2.57 (1H, s), 6.27 (1H, s), 7.59 (1H, s), 8.21 (1H, s), 11.9 (1H, s).  $^{13}\text{C}$  NMR (126 MHz, DMSO- $d_6$ )  $\delta$  (ppm) 163.2, 161.9, 153.2, 148.1, 146.0, 138.7, 135.5, 131.7, 123.3, 122.0, 121.6, 116.4, 104.9, 14.6, 13.9, 11.5, 11.1. HRMS (APCI) : calcd. For  $\text{C}_{17}\text{H}_{16}\text{BF}_2\text{N}_3\text{O}_2$ , 343.1301, found 343.1298  $[\text{M}]^+$ . Elemental analysis: calcd. For  $\text{C}_{17}\text{H}_{16}\text{BF}_2\text{N}_3\text{O}_2$ : C, 59.51; H, 4.70; N, 12.25, Found: C, 59.46; H, 4.83; N, 12.22

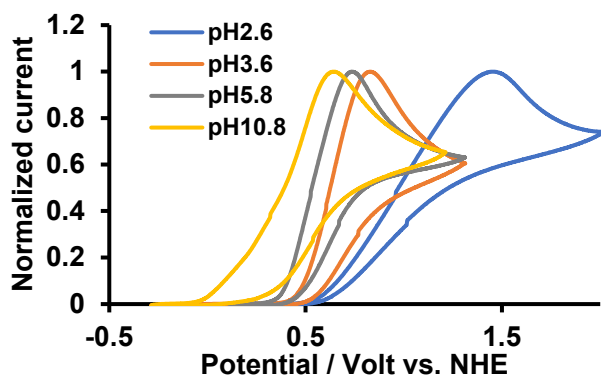

Fig. S1. Cyclic voltammogram of ascorbic acid in several pH containing phosphate buffer solution as an electrolyte.

Table S1. Theoretical data for compound 1. (Calculated by B3LYP/6-31G(d,p) level using Gaussian 16W).

| $\lambda_{(calcd.)} / \text{nm}$ | Calculated assignment <sup>a</sup> |   |                | $f_{(Calcd.)}$ |
|----------------------------------|------------------------------------|---|----------------|----------------|
| 534.14                           | HOMO                               | → | LUMO (87.2%)   | 0.6091         |
|                                  | HOMO                               | → | LUMO+1 (12.2%) |                |
| 483.22                           | HOMO                               | → | LUMO+1 (81.4%) | 0.3075         |
|                                  | HOMO                               | → | LUMO (10.0%)   |                |
|                                  | HOMO-1                             | → | LUMO (7.2%)    |                |
| 459.47                           | HOMO-1                             | → | LUMO (79.0%)   | 0.2418         |
|                                  | HOMO-2                             | → | LUMO (12.0%)   |                |
|                                  | HOMO                               | → | LUMO+1 (3.5%)  |                |
| 433.75                           | HOMO-2                             | → | LUMO (82.7%)   | 0.1416         |
|                                  | HOMO-1                             | → | LUMO (9.2%)    |                |
| 386.57                           | HOMO-1                             | → | LUMO+1 (88.0%) | 0.6734         |
|                                  | HOMO-5                             | → | LUMO (3.1%)    |                |

<sup>a</sup>Data given in parentheses are  $2 \times (\text{CI coefficient})^2 \times 100\%$

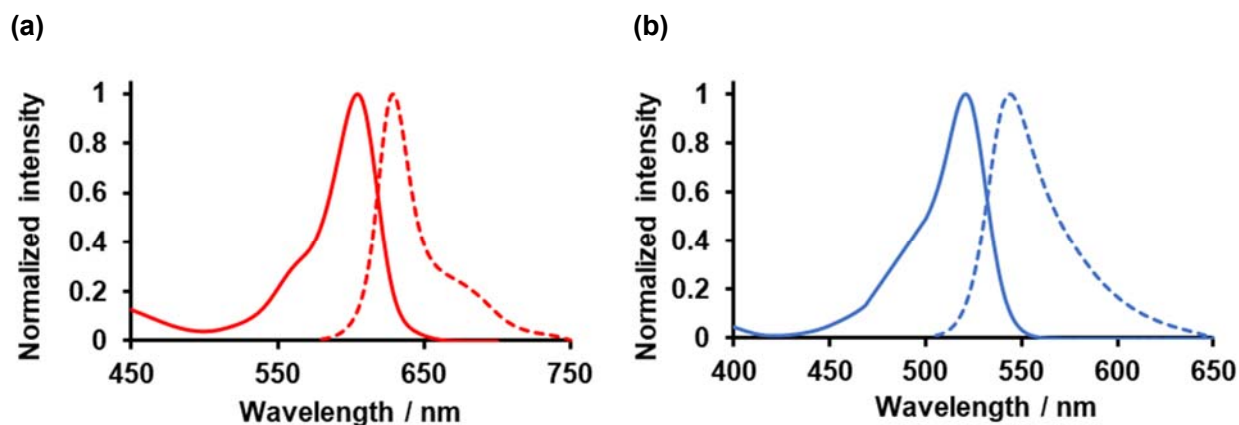

Fig. S2. Normalized absorption (blue solid line) and fluorescence (dashed line) spectra of 1 (a) and 2 (b) in THF.

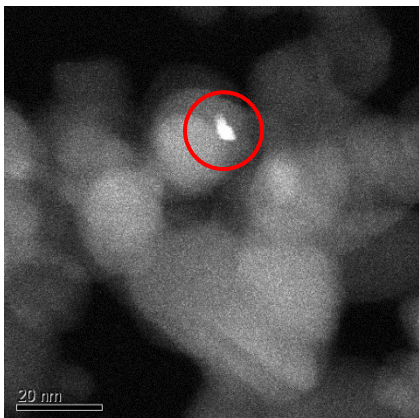

**Fig. S3.** High angle annular dark field scanning transmission electron microscopy (HAADF-STEM) images of P25/Pt.

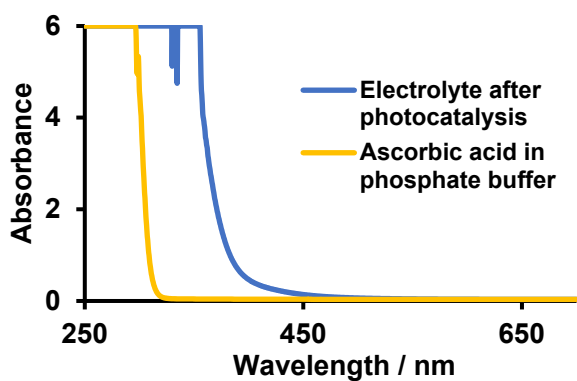

**Fig. S4.** UV-vis absorption spectrum of electrolyte (blue solid line) after 30 h photocatalysis using P25/Pt/1 and ascorbic acid in phosphate buffer solution (orange dashed line).

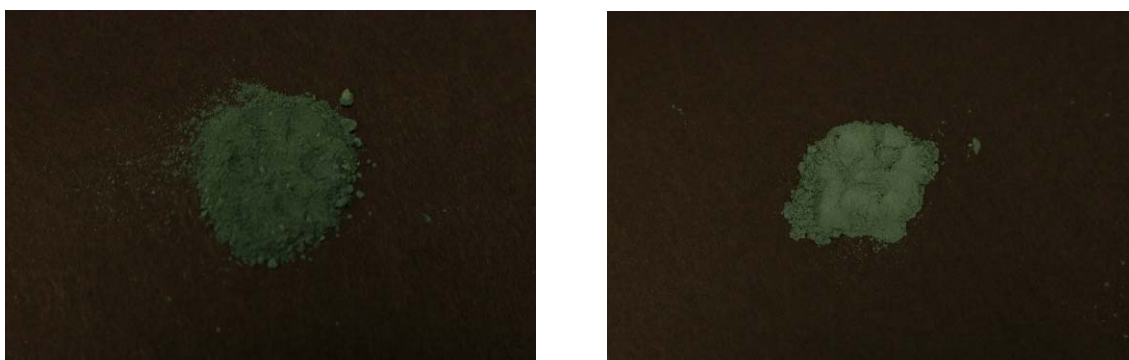

**Fig. S5.** Photographs of P25/Pt/1 before (left) and after (right) 30 h of photoirradiation.

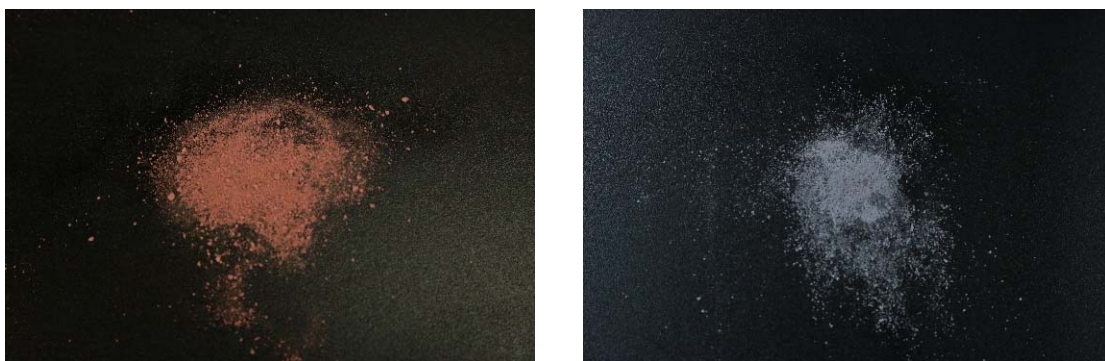

Fig. S6. Photographs of P25/Pt/2 before (left) and after (right) 10 h of photoirradiation.

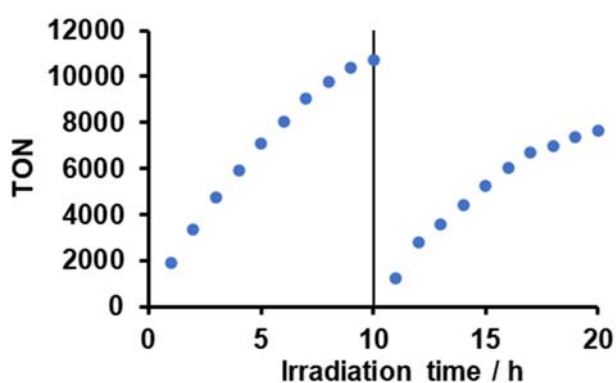

Fig. S7. Cycling test of H<sub>2</sub> evaluation for P25/Pt/1 (6.0 mg) in the presence of ascorbic acid in phosphate buffer (pH 7.0) under 100 mW cm<sup>-2</sup> light irradiation ( $\lambda > 400$  nm).

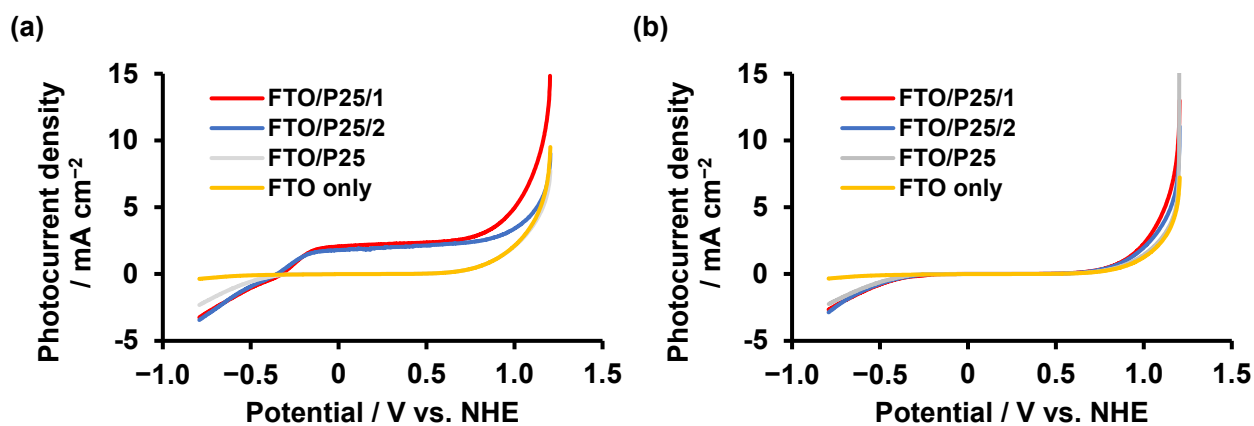

Fig. S8. Linear sweep voltammetry of FTO/P25/1 and FTO/P25/2 with photoirradiation (a) and under dark conditions (b). Scan rate = 0.05 V s<sup>-1</sup>.

Table S2. Photoluminescence decay profiles of **1** in the presence and absence of ascorbic acid in MeOH.

|                  | $\tau_1$ / ns | $A_1$ / % | $\tau_2$ / ns | $A_2$ / % | $\langle \tau \rangle^a$ |
|------------------|---------------|-----------|---------------|-----------|--------------------------|
| <b>1</b> plus AA | 0.082         | 34.9      | 2.15          | 65.1      | 2.11                     |
| <b>1</b>         | 0.10          | 37.6      | 4.99          | 62.4      | 4.93                     |

<sup>a</sup>The  $\langle \tau \rangle$  values of were determined with  $\langle \tau \rangle = (A_1\tau_1^2 + A_2\tau_2^2)/(A_1\tau_1 + A_2\tau_2)$ .

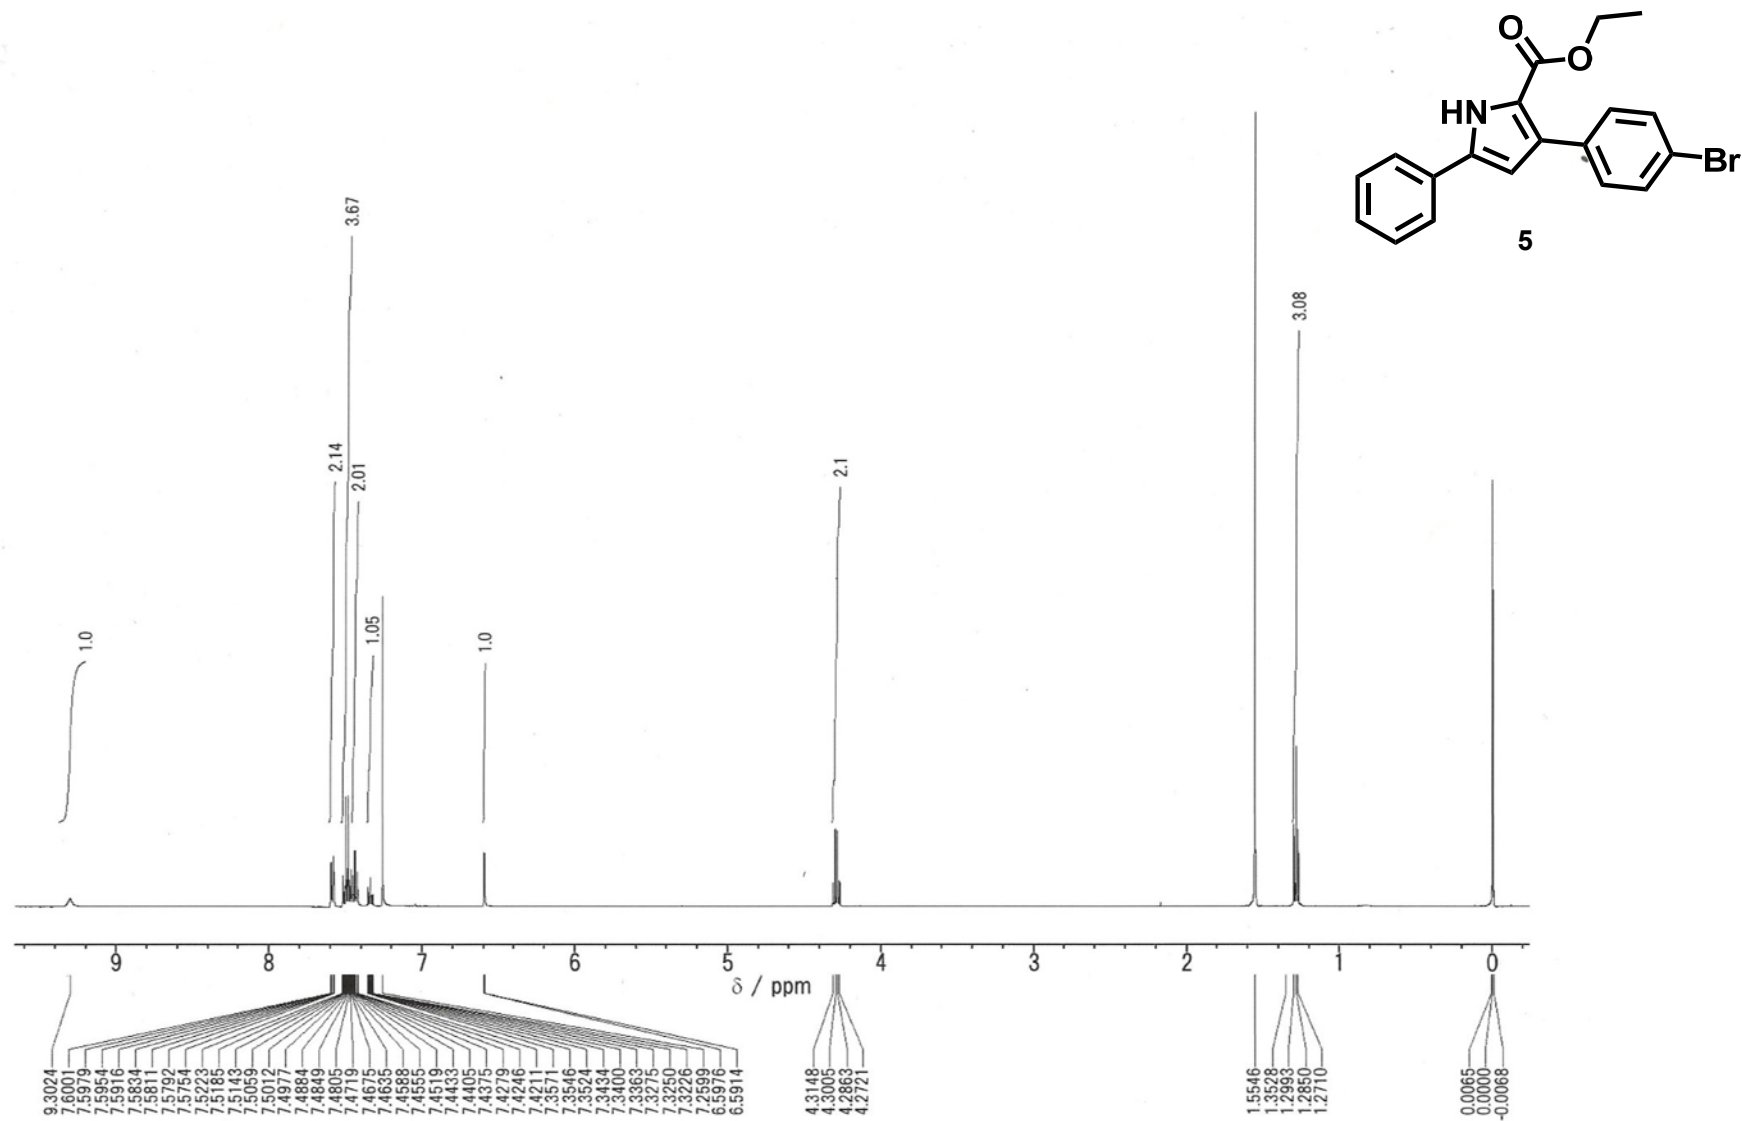

Fig. S9. <sup>1</sup>H NMR spectrum of **5** (500 MHz) in CDCl<sub>3</sub>.



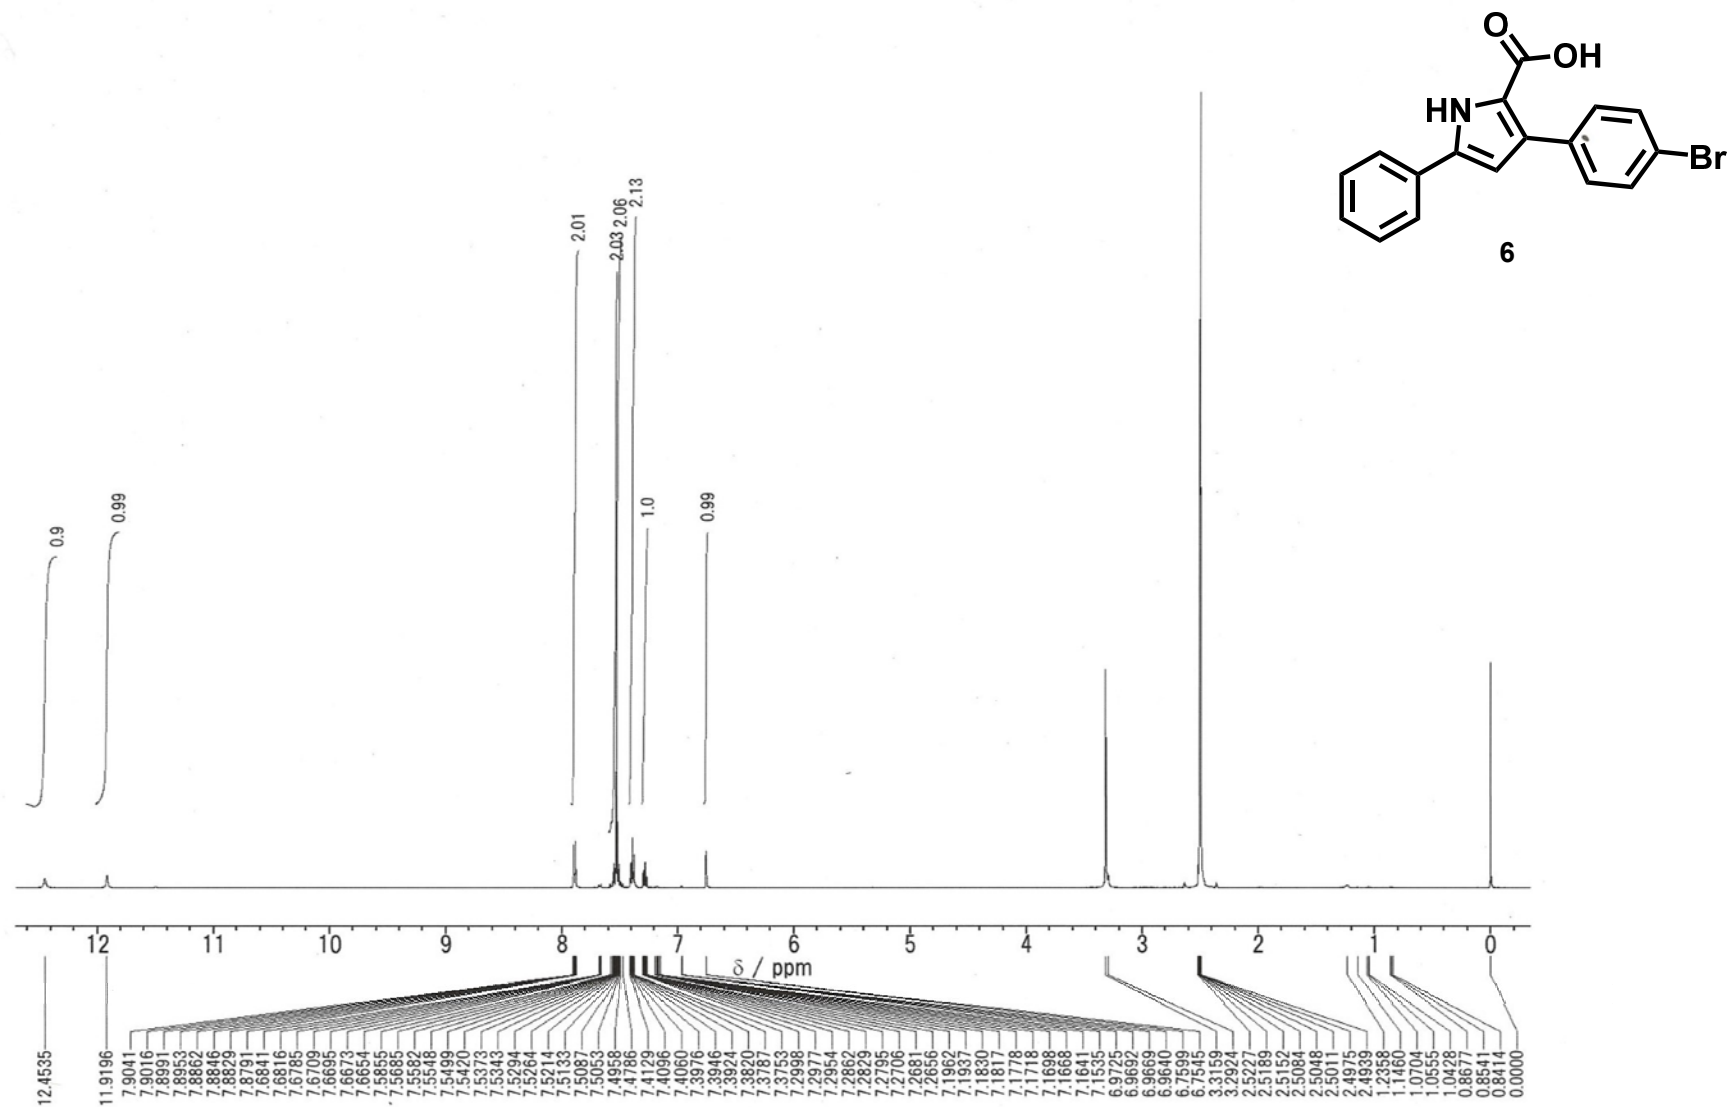

Fig. S10. <sup>1</sup>H NMR spectrum of 6 (500 MHz) in DMSO-*d*<sub>6</sub>.



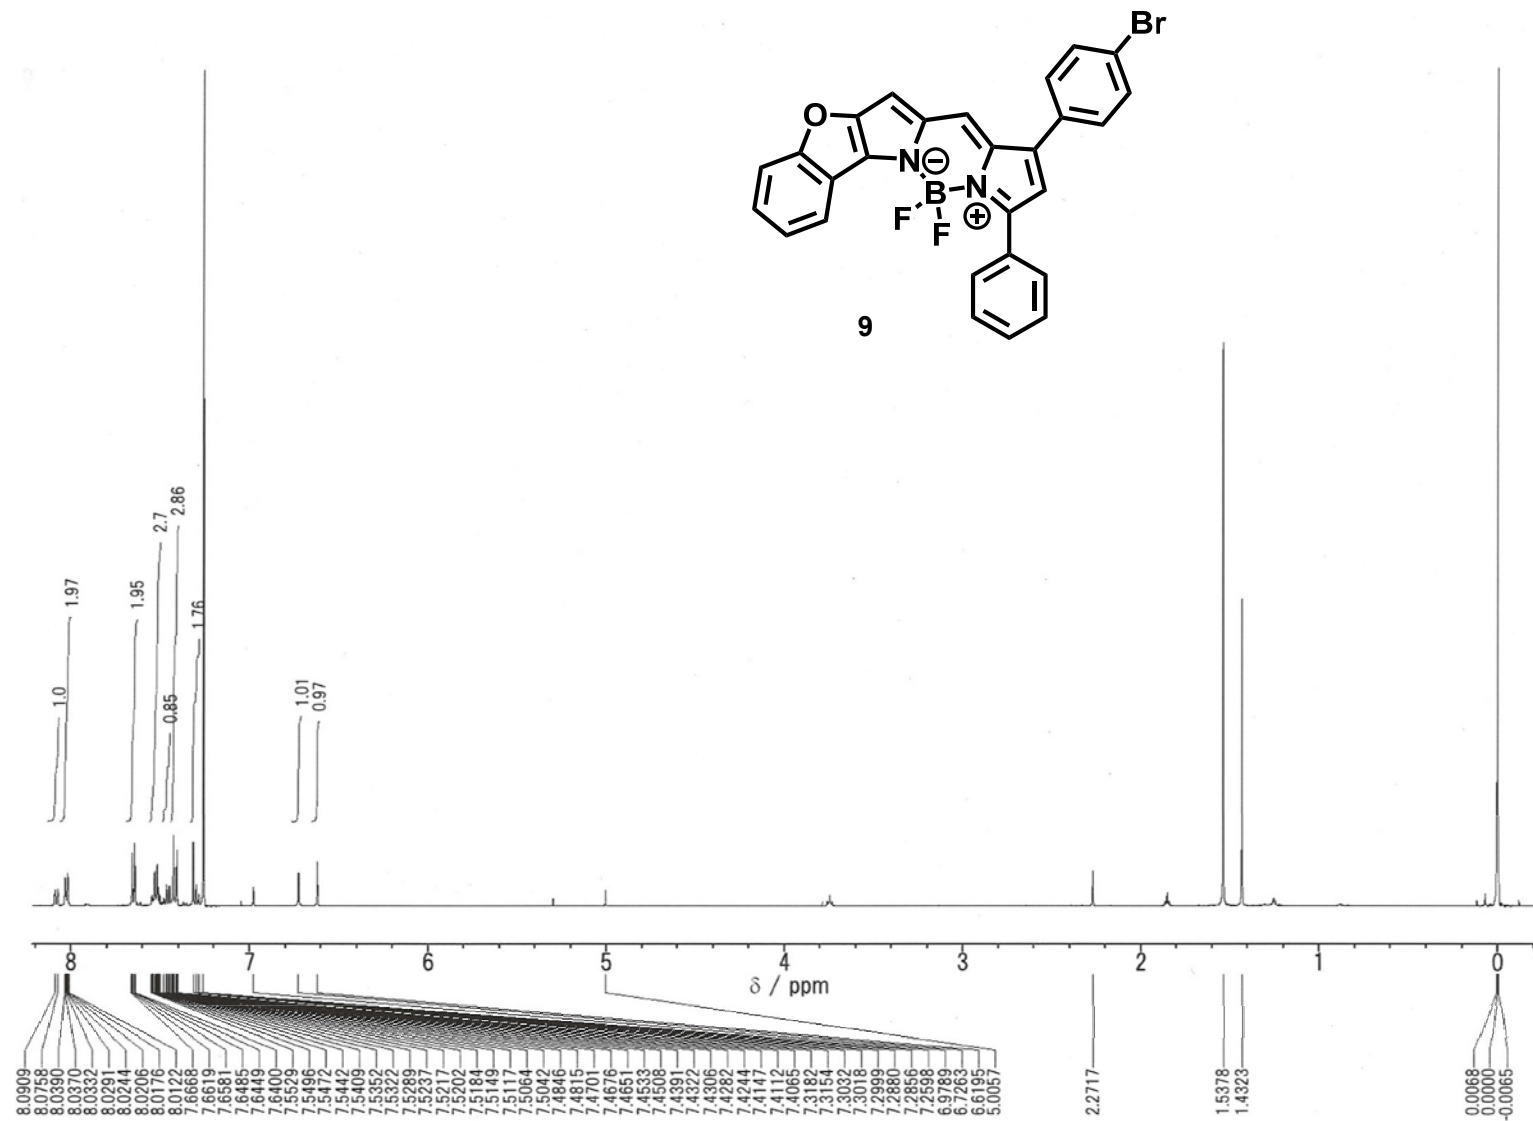

Fig. S12. <sup>1</sup>H NMR spectrum of 9 (500 MHz) in CDCl<sub>3</sub>.

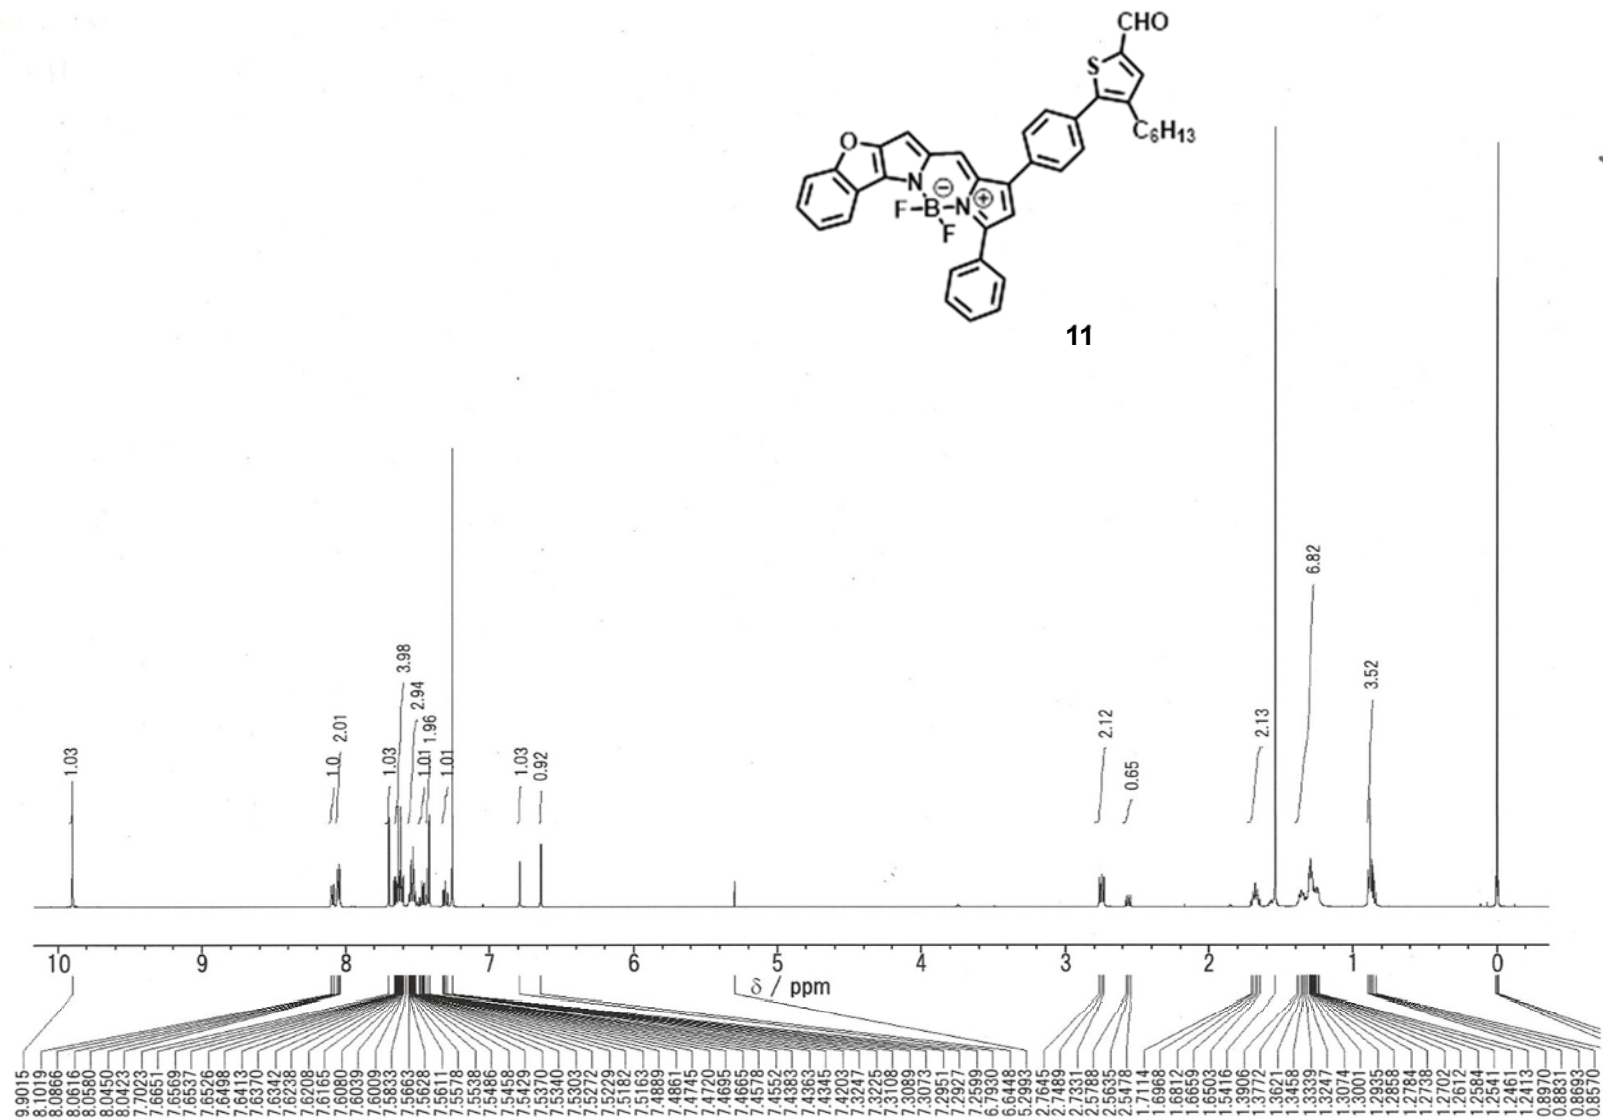

**Fig. S13.**  $^1\text{H}$  NMR spectrum of **11** (500 MHz) in  $\text{CDCl}_3$ .

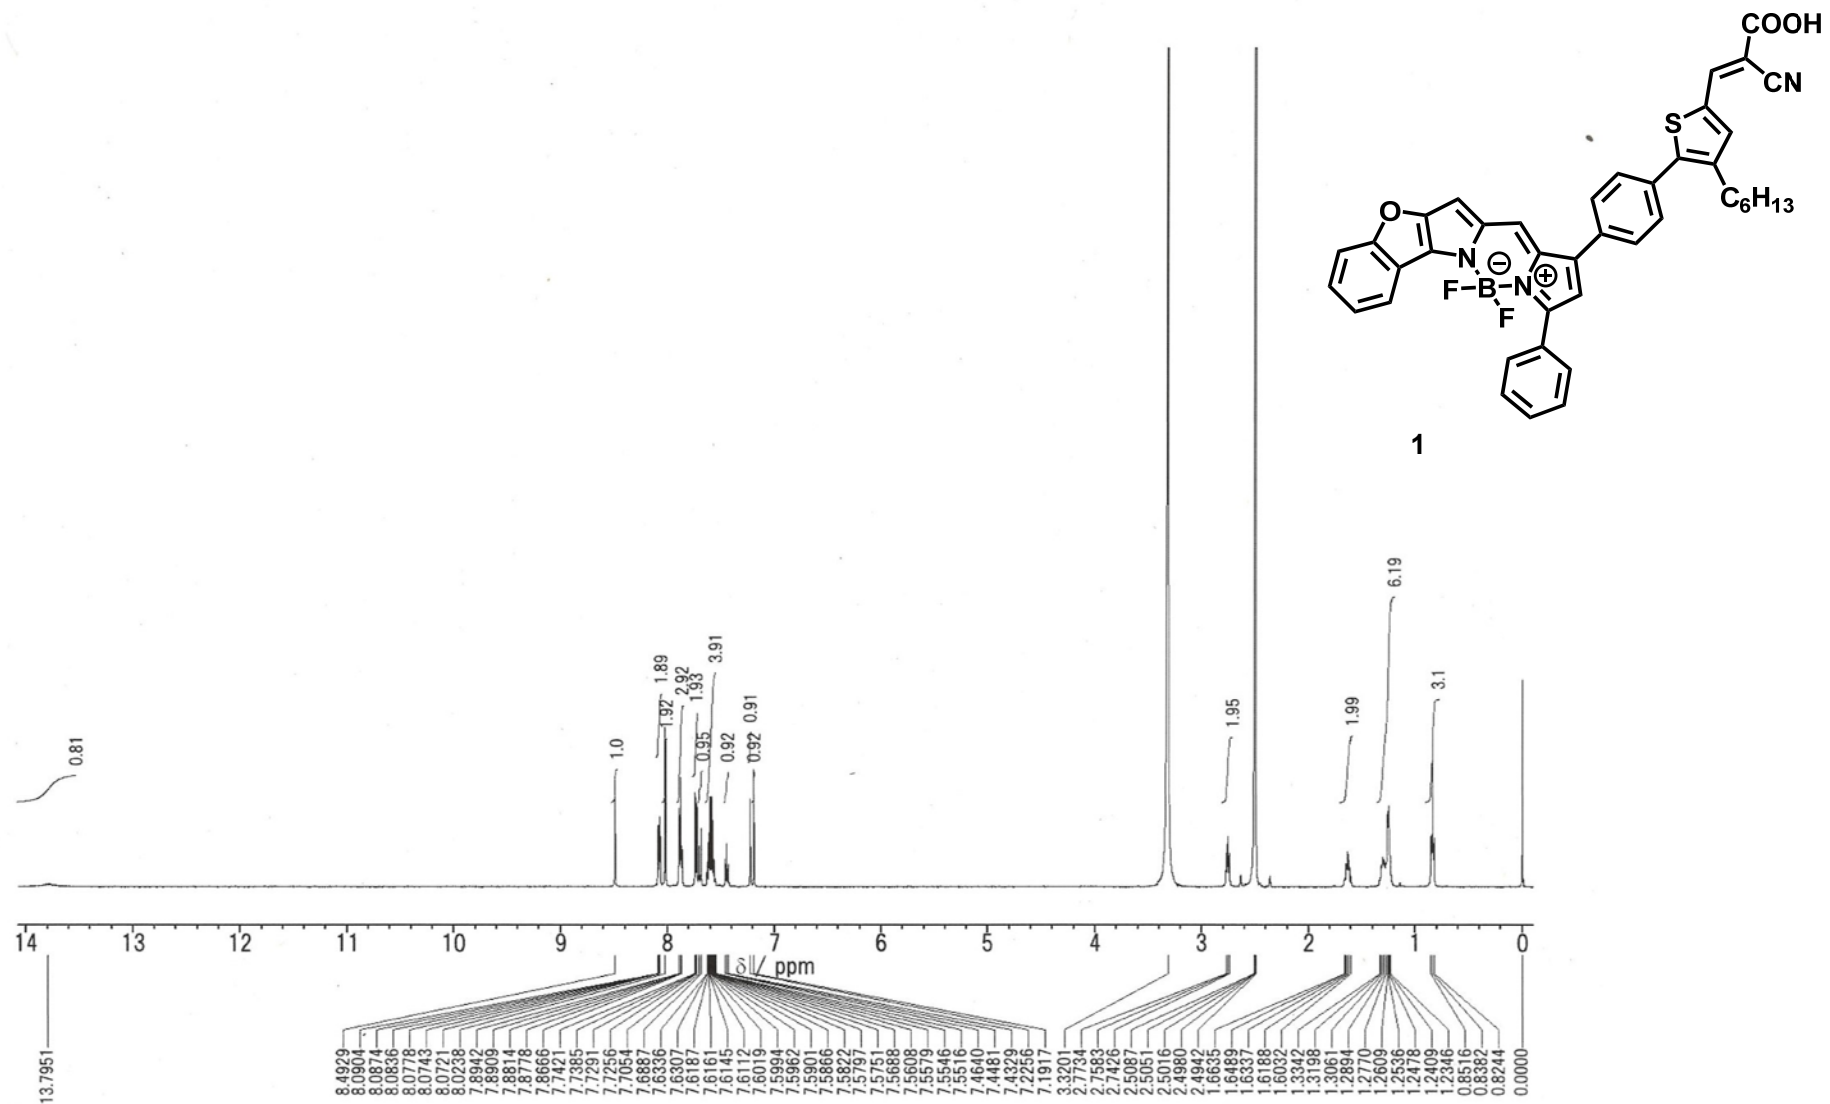

Fig. S14. <sup>1</sup>H NMR spectrum of 1 (500 MHz) in DMSO-*d*<sub>6</sub>.

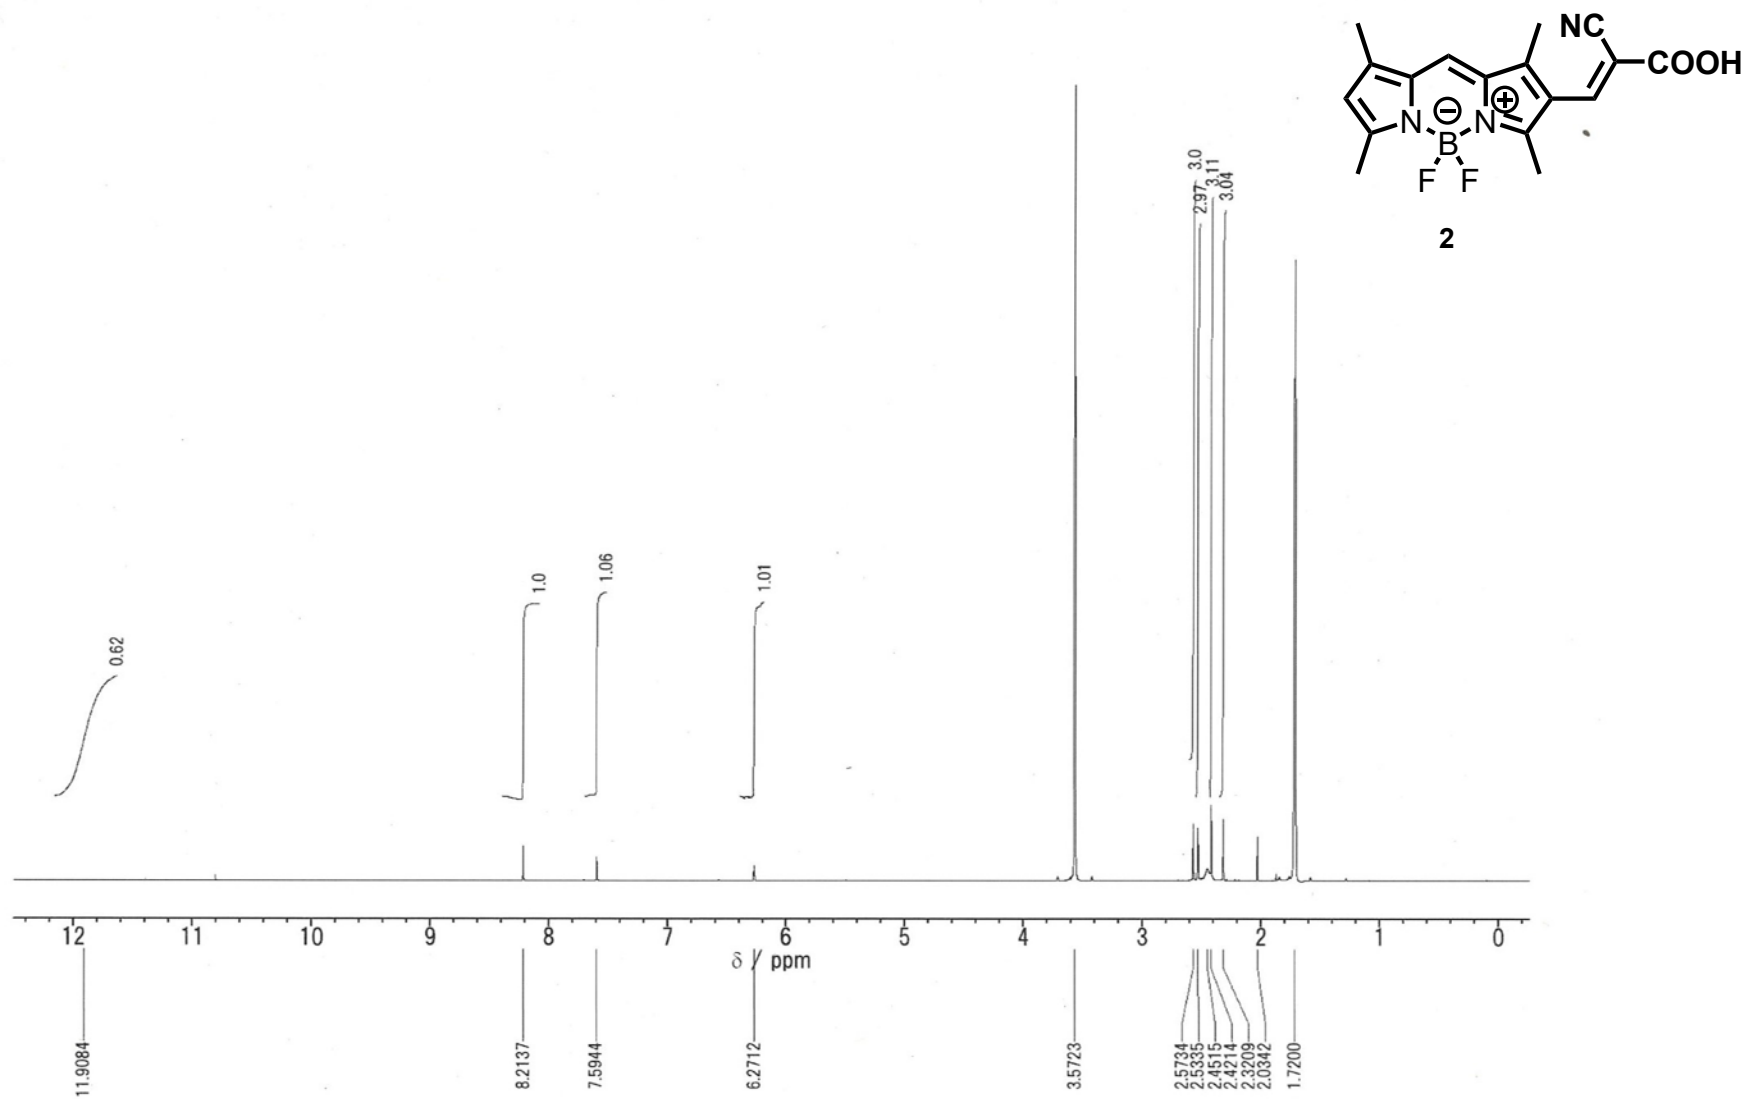

Fig. S15. <sup>1</sup>H NMR spectrum of 2 (500 MHz) in THF-*d*<sub>8</sub>.

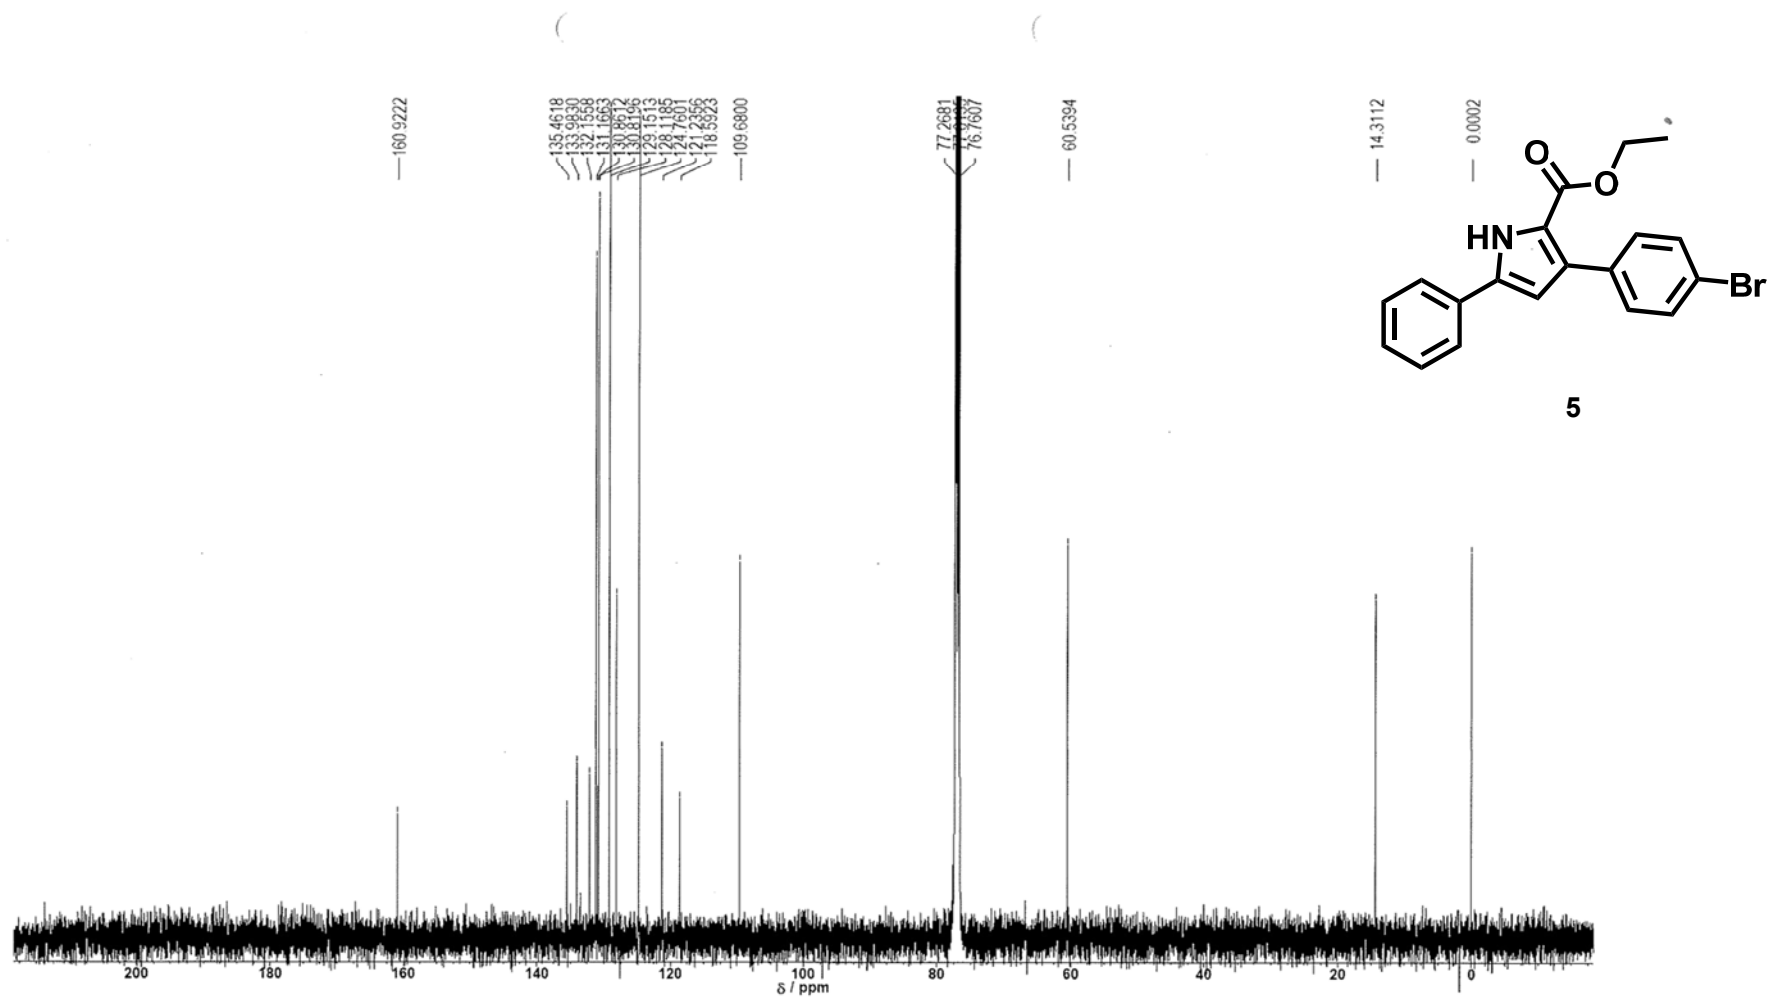

Fig. S16.  $^{13}\text{C}$  NMR spectrum of **5** (500 MHz) in  $\text{CDCl}_3$ .

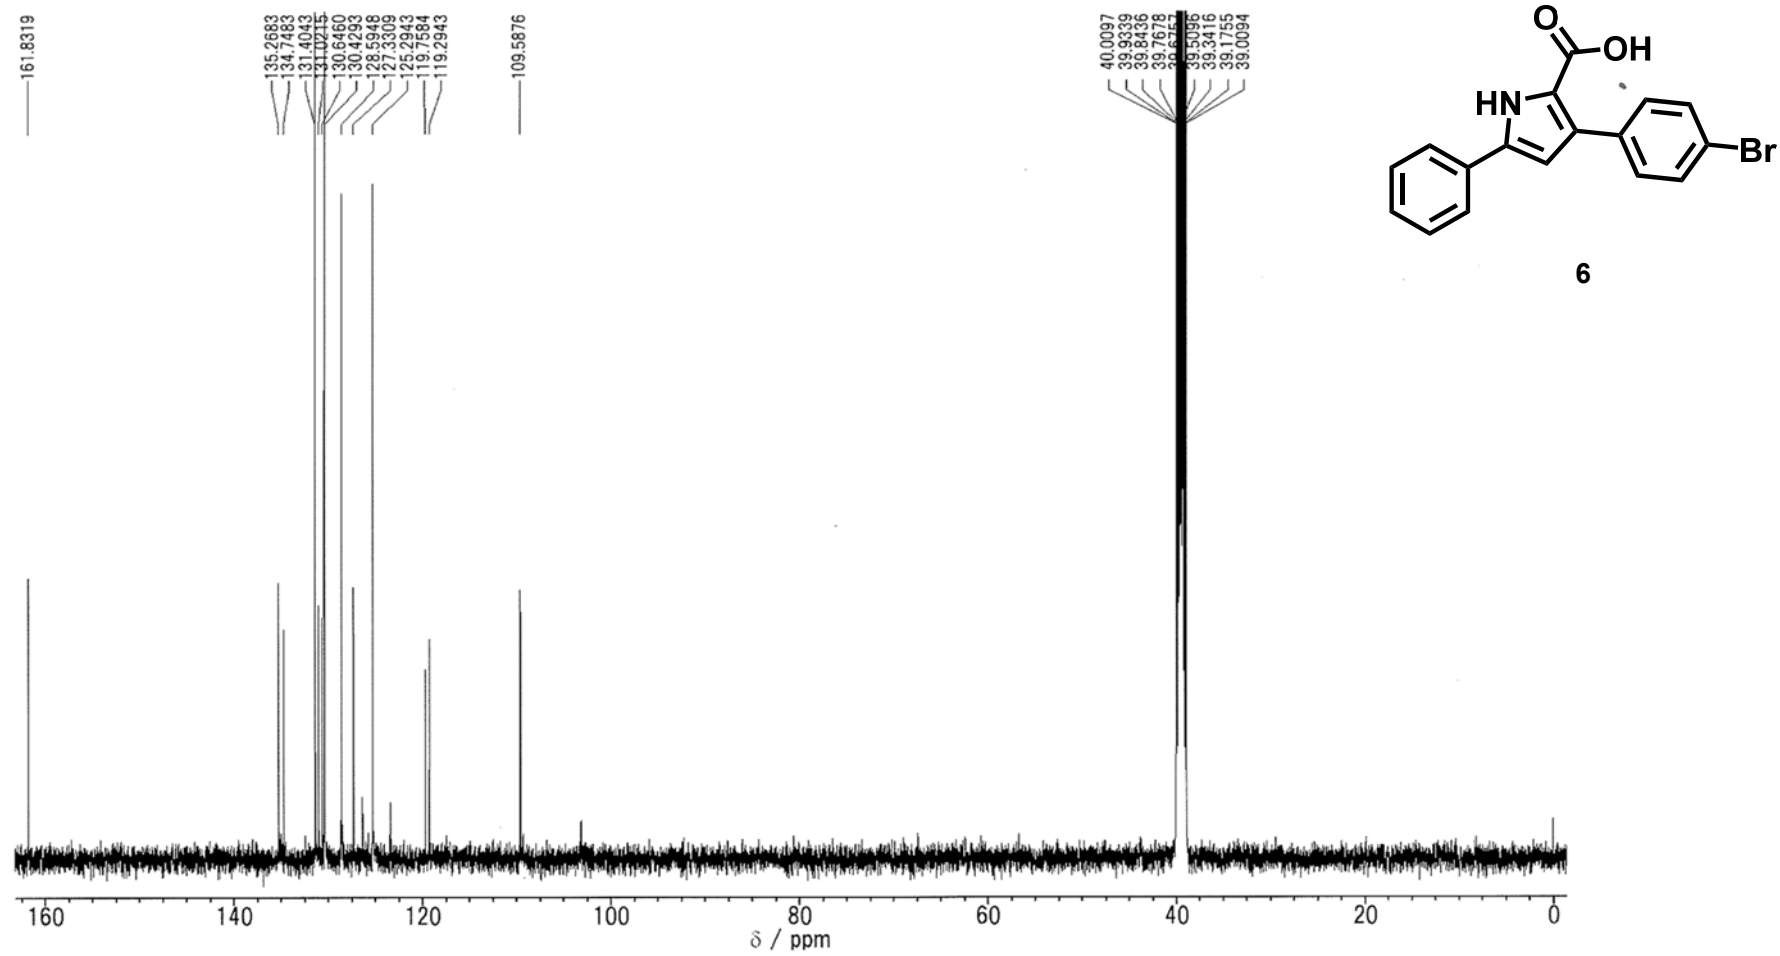

Fig. S17.  $^{13}\text{C}$  NMR spectrum of **6** (500 MHz) in  $\text{DMSO-}d_6$ .



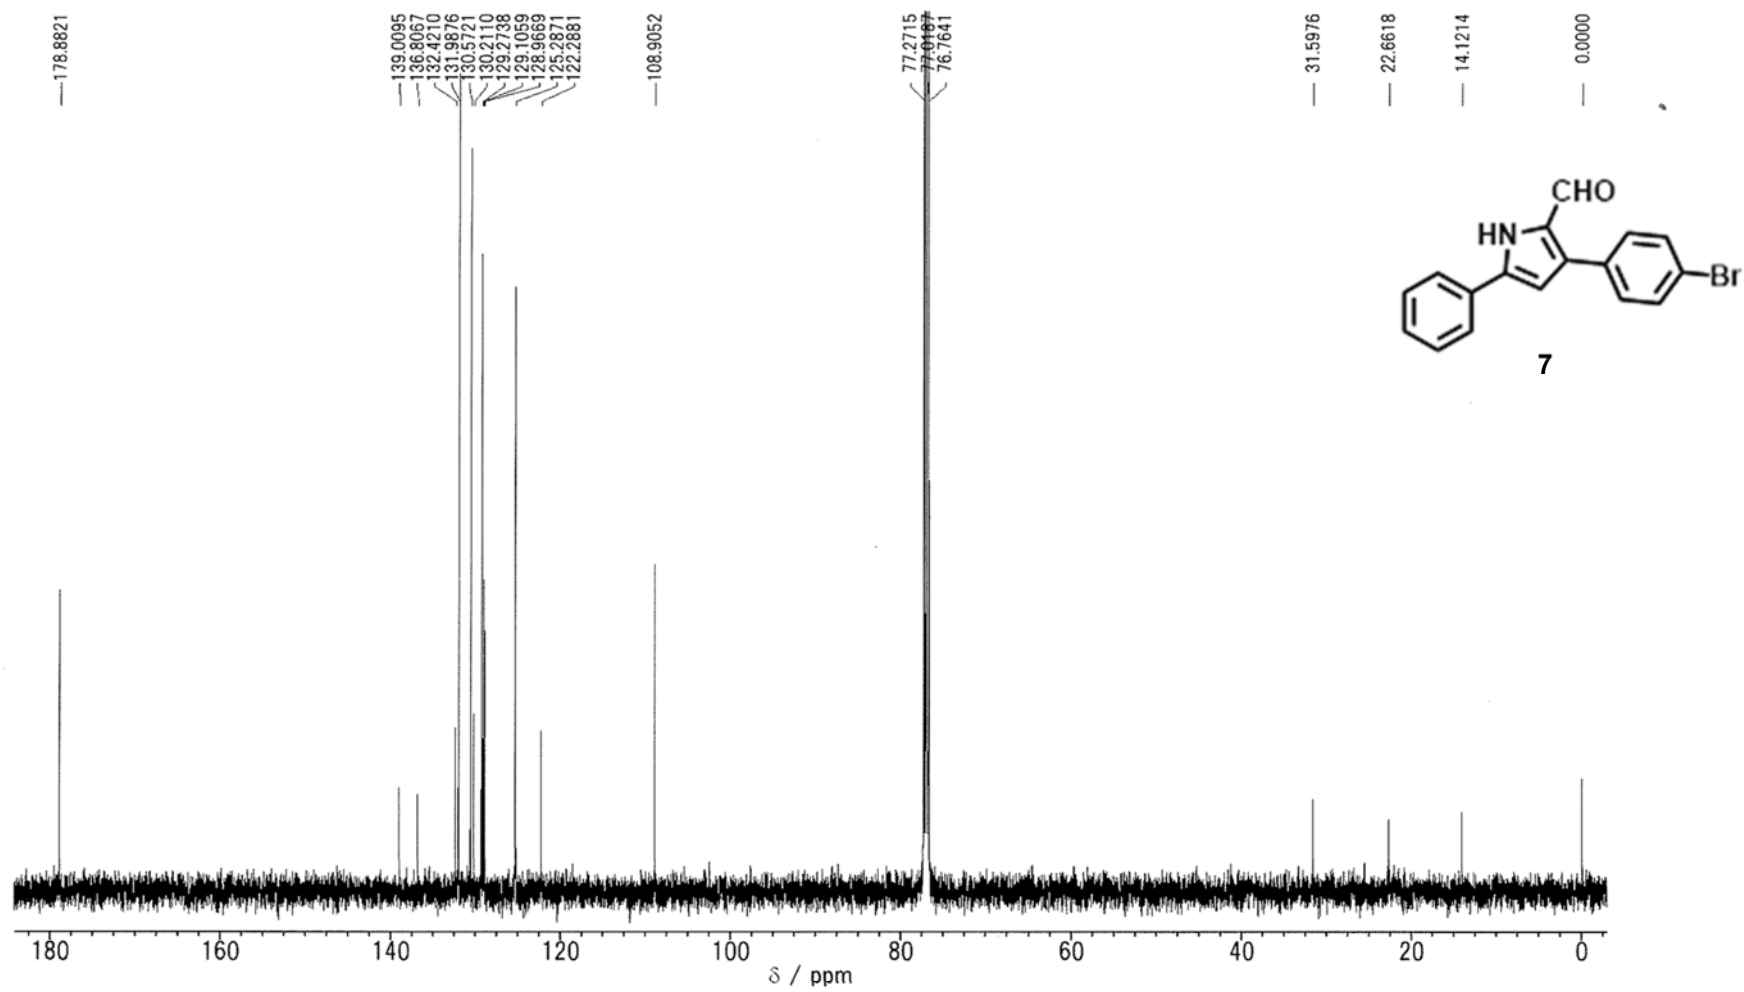

Fig. S18.  $^{13}\text{C}$  NMR spectrum of 7 (500 MHz) in  $\text{CDCl}_3$ .

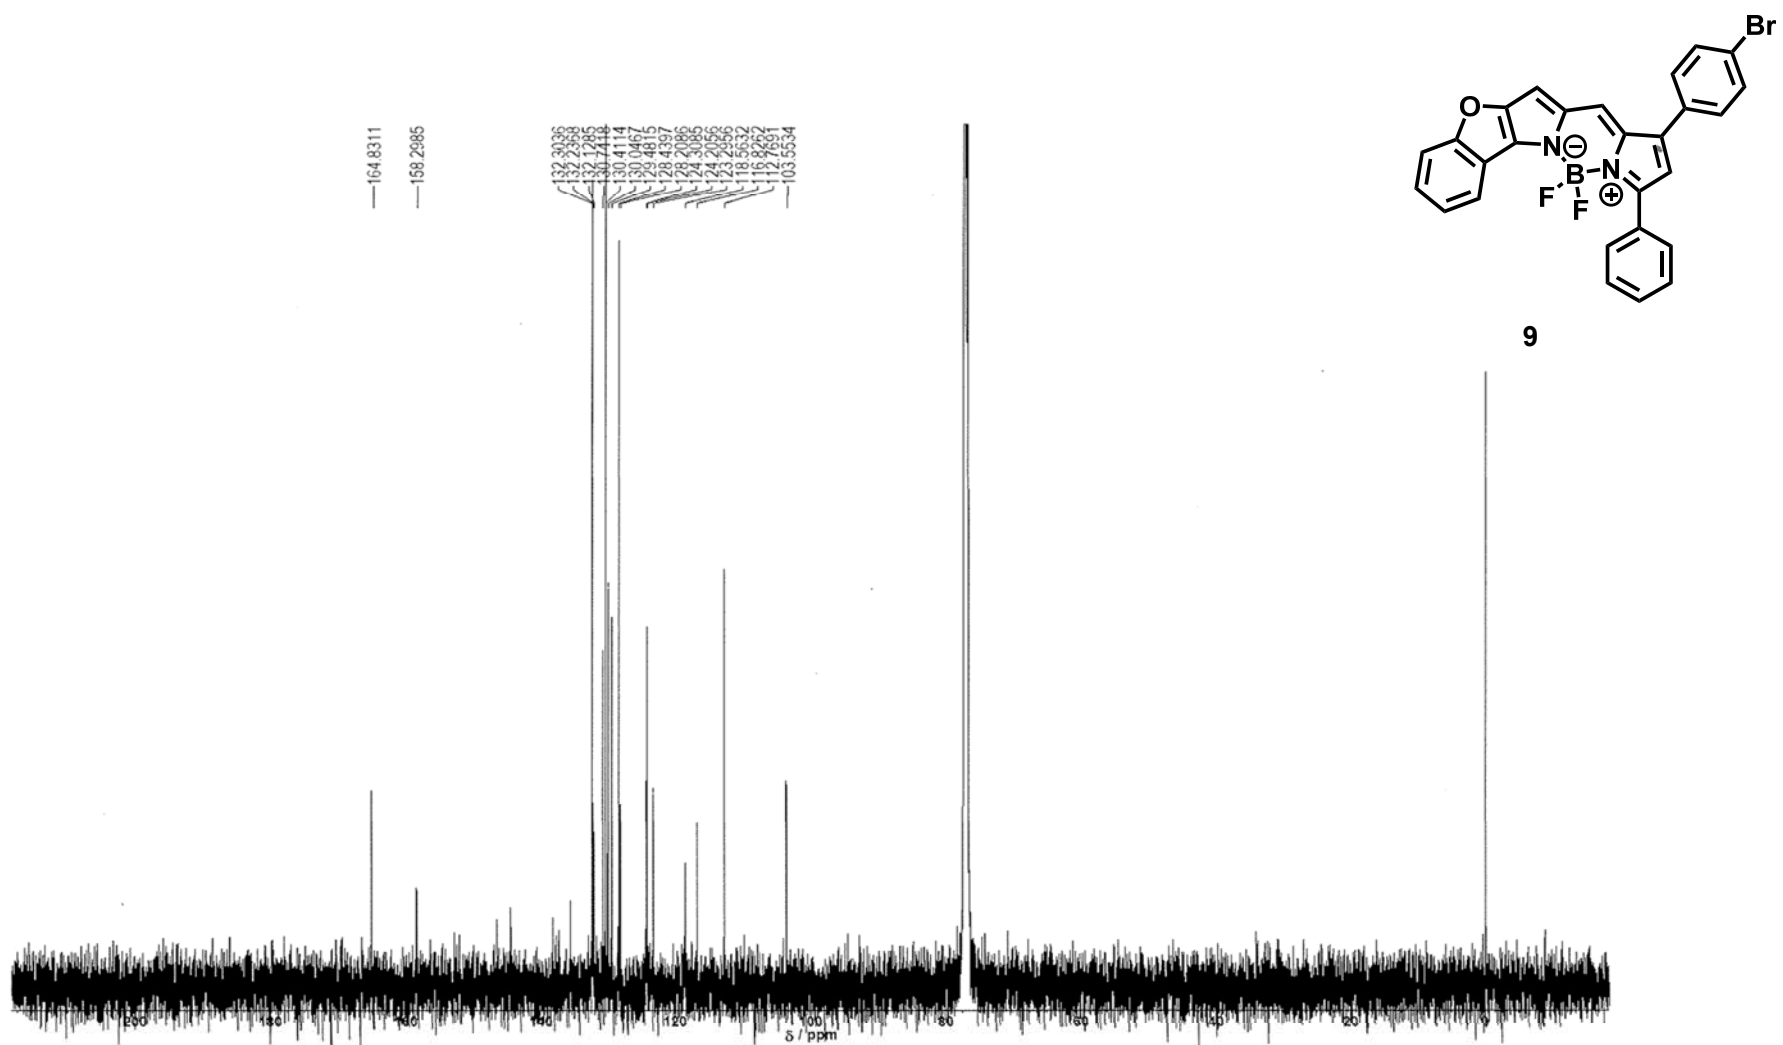

Fig. S19. <sup>13</sup>C NMR spectrum of 9 (500 MHz) in CDCl<sub>3</sub>.

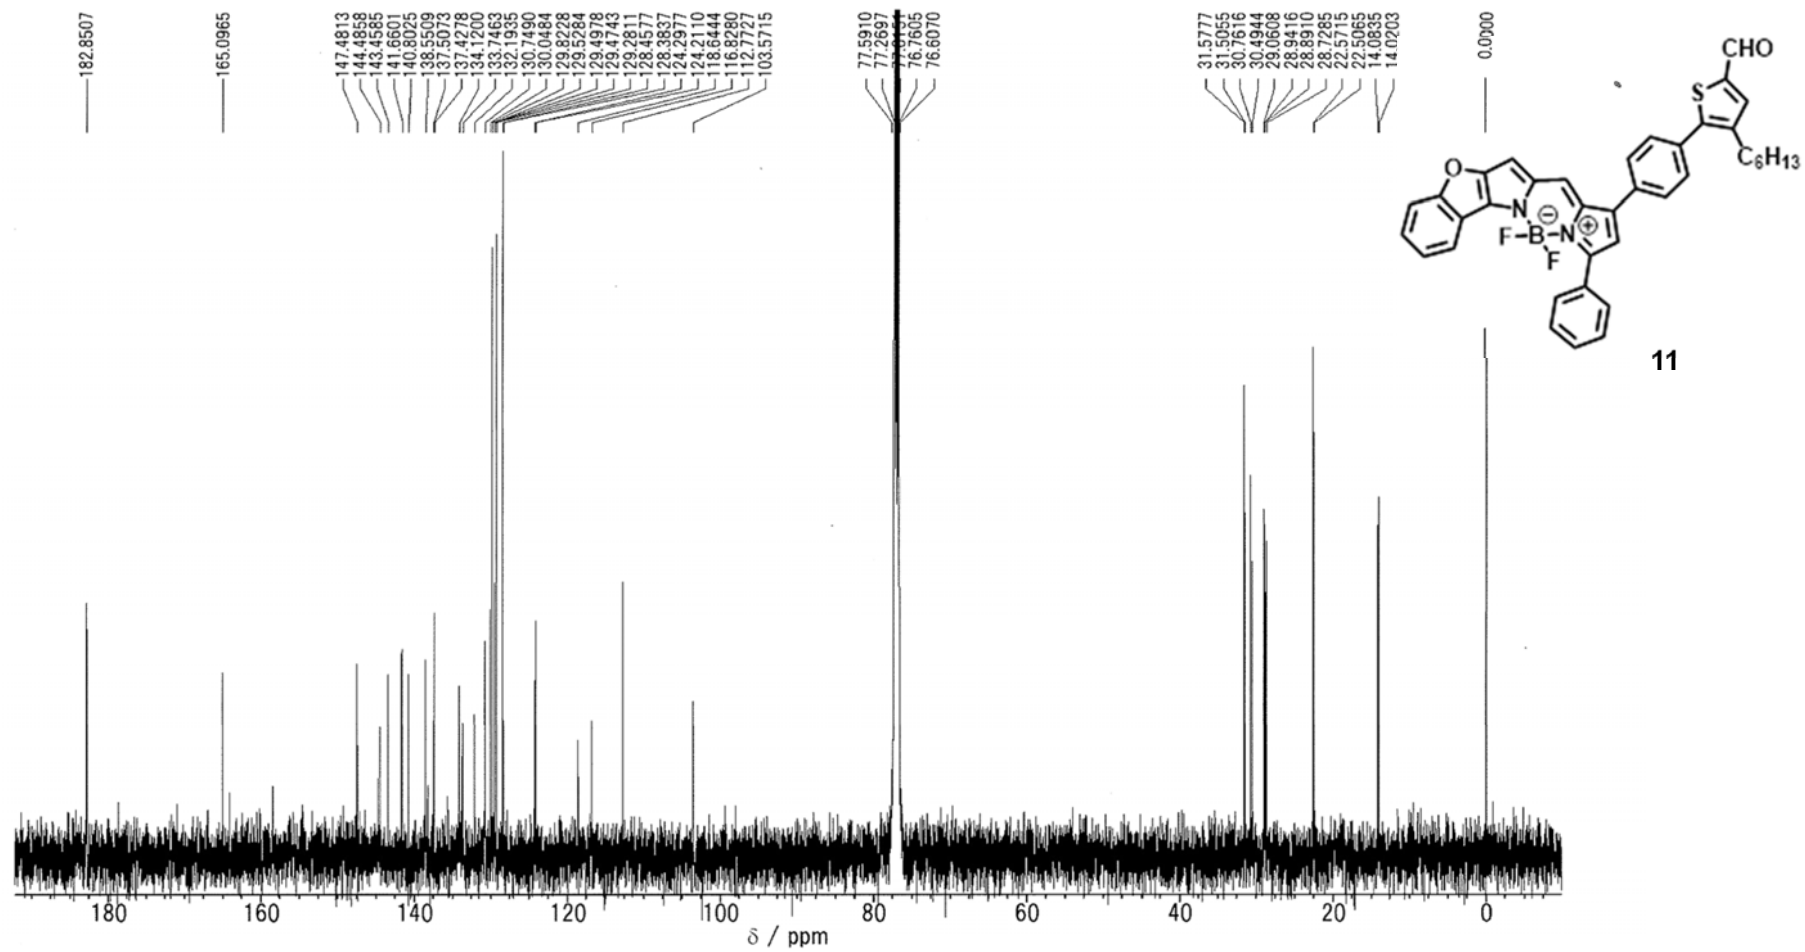

Fig. S20. <sup>13</sup>C NMR spectrum of **11** (500 MHz) in CDCl<sub>3</sub>.

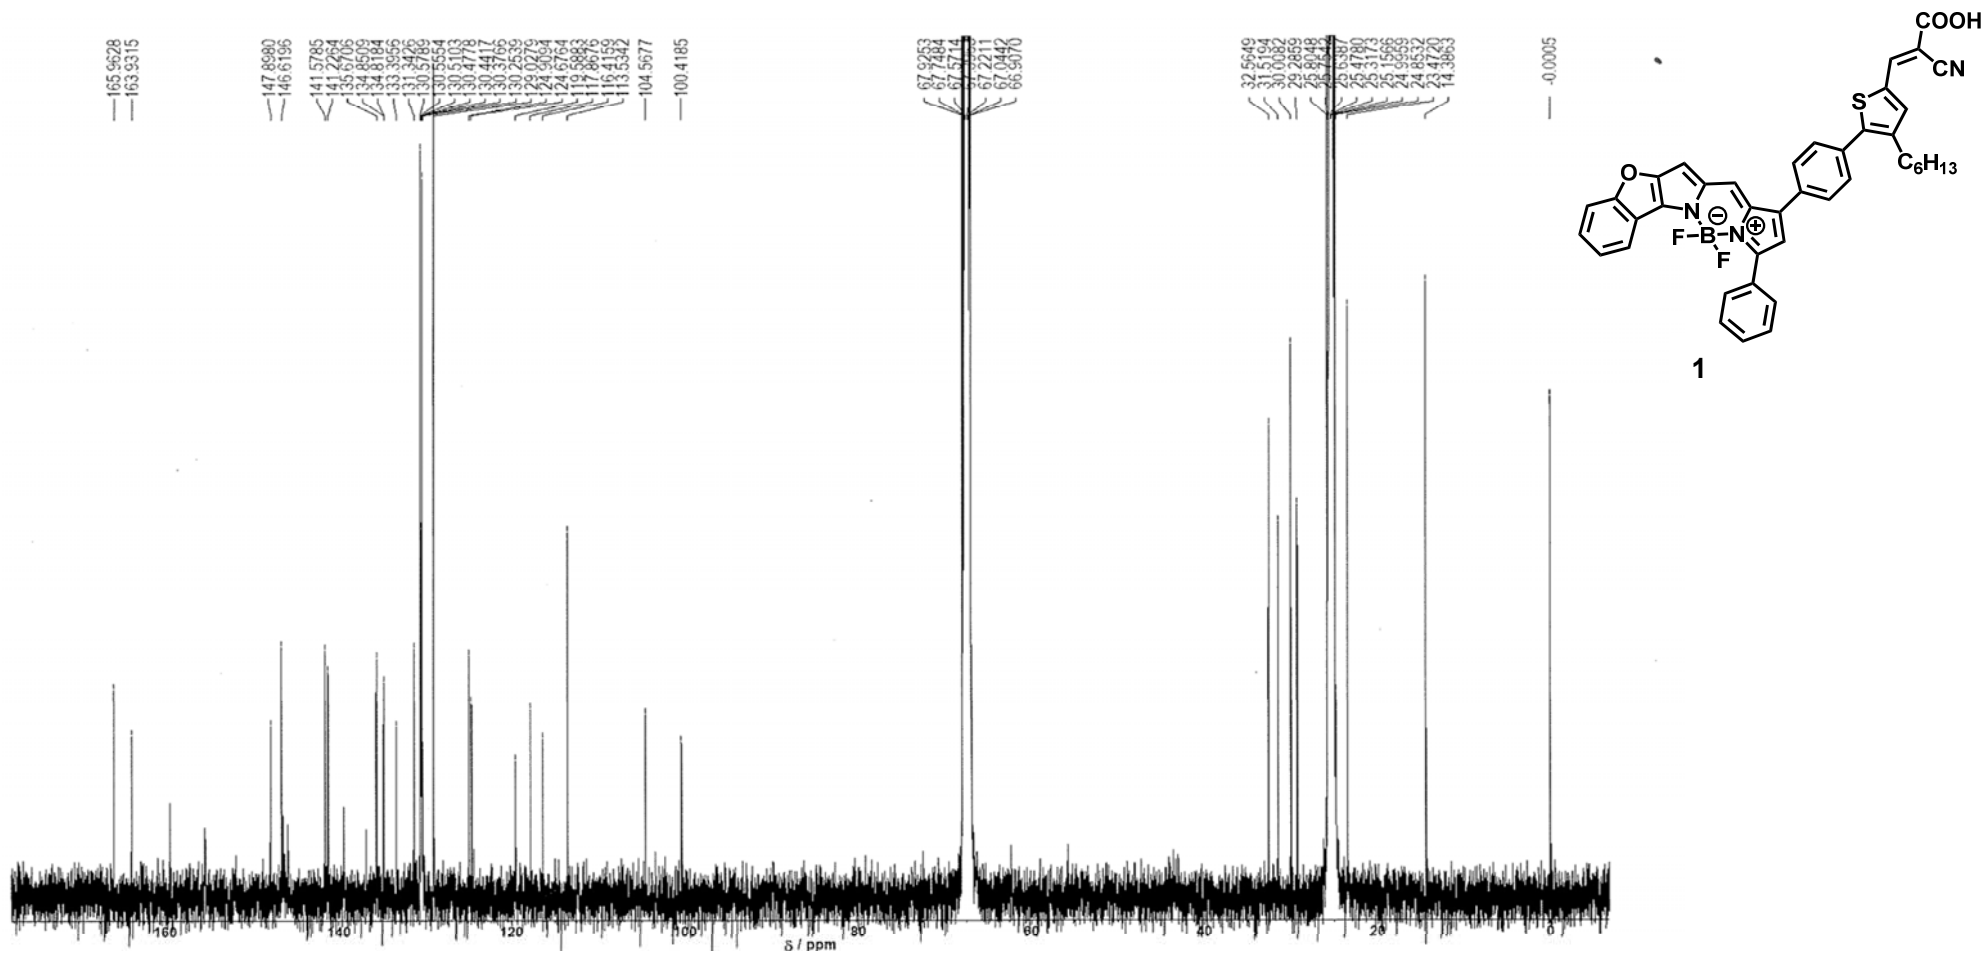

Fig. S21. <sup>13</sup>C NMR spectrum of 1 (500 MHz) in THF-*d*<sub>8</sub>.

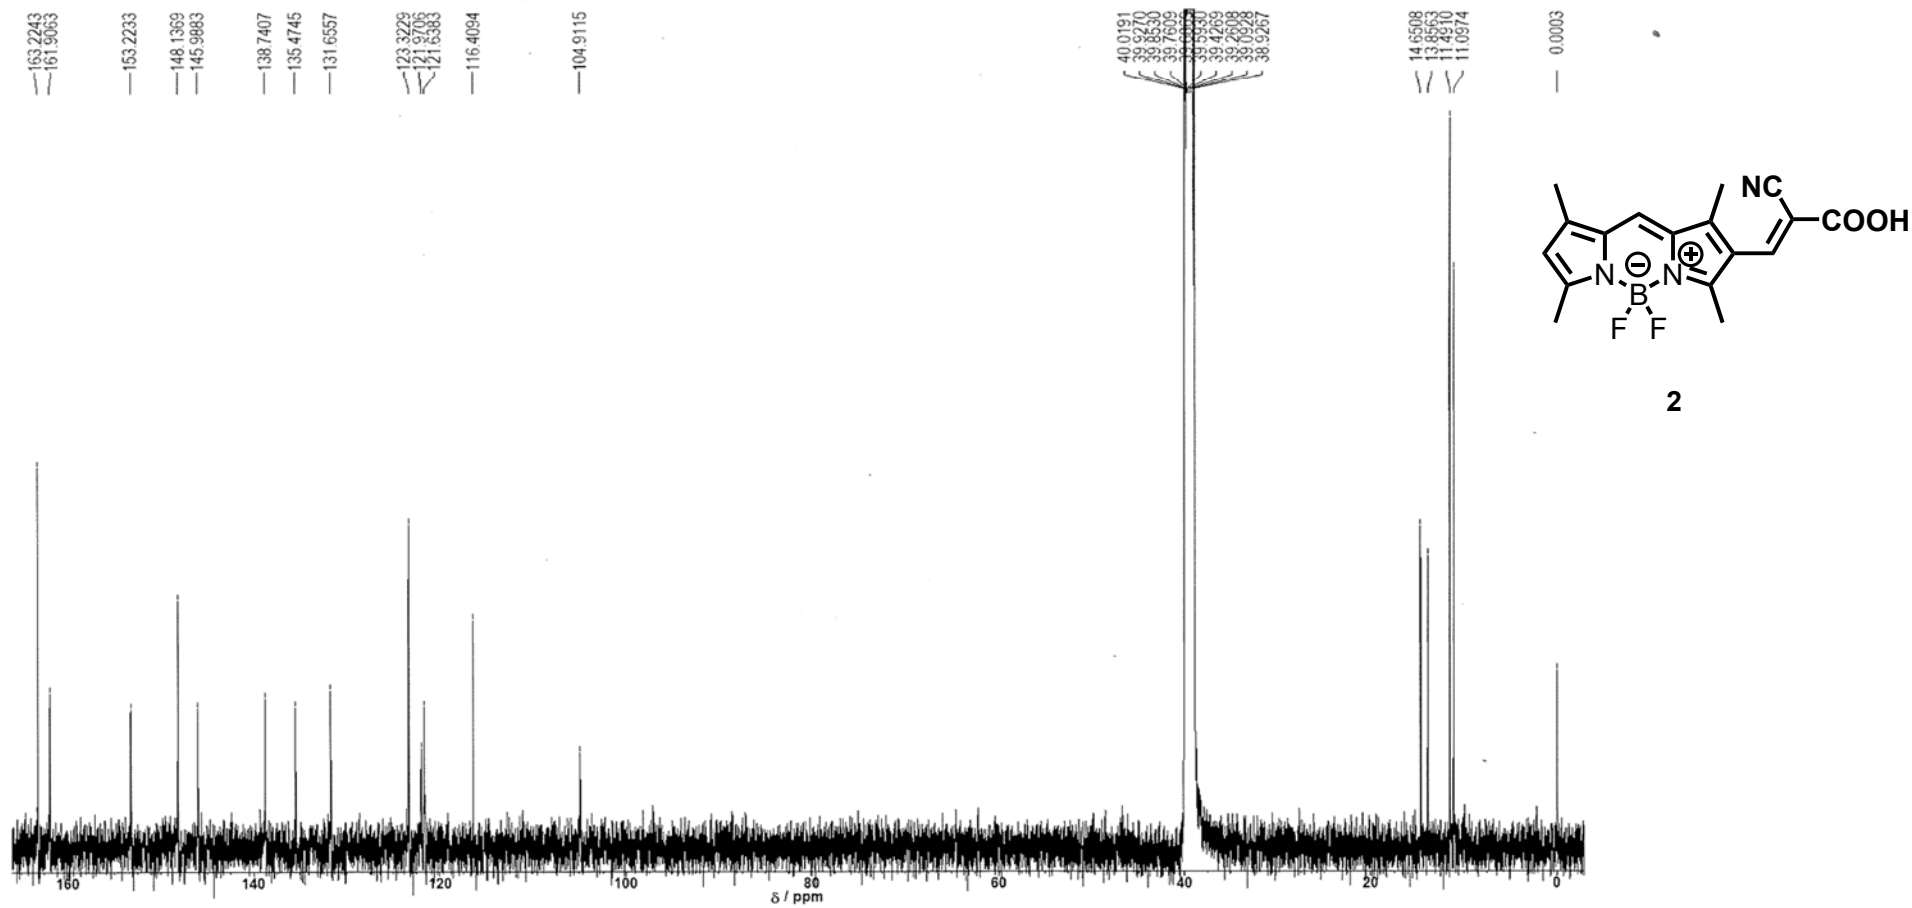

Fig. S22. <sup>13</sup>C NMR spectrum of **2** (500 MHz) in DMSO-*d*<sub>6</sub>.

# Generic Display Report

## Analysis Info

Analysis Name D:\Data\syn1\kubo\2021-0127\#3\_i\_dye3\_1.d  
Method APCI\_pos\_DIP.m  
Sample Name #3\_i\_dye3\_1  
Comment Cap 150  
Hex 400  
Temp 300

Acquisition Date 1/28/2021 4:09:44 AM

Operator BDAL@DE  
Instrument micrOTOF

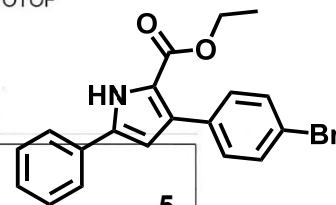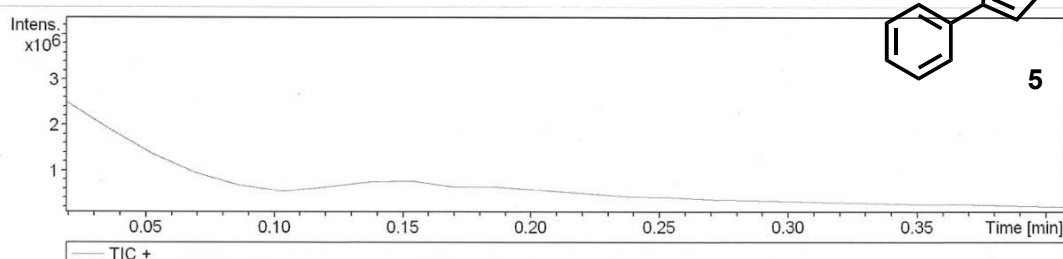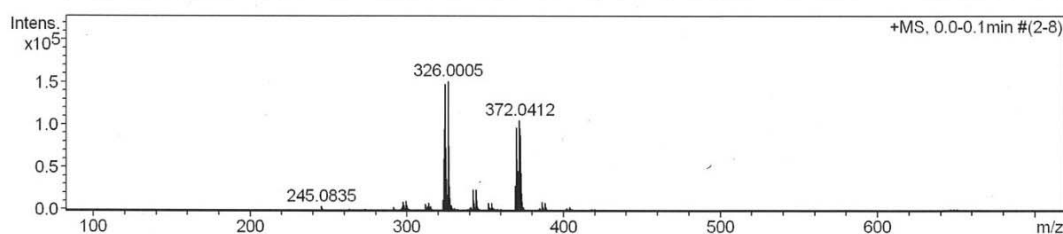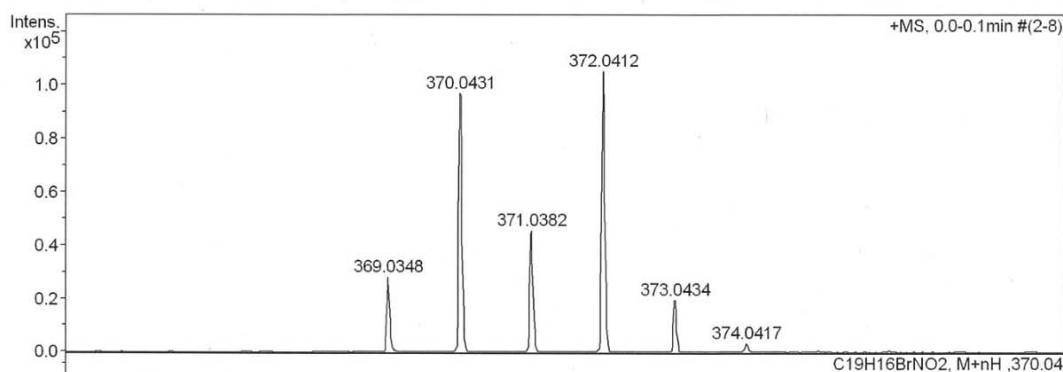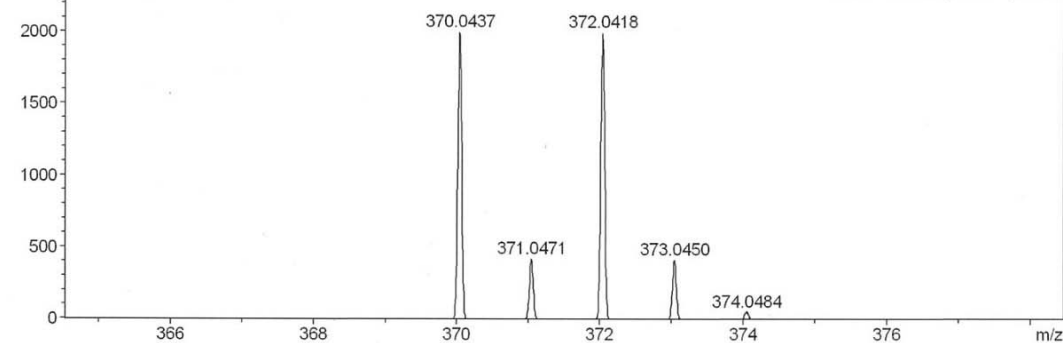

**Fig. S23.** High resolution of APCI mass spectrum (positive mode) of **5**.

## Generic Display Report

### Analysis Info

Analysis Name D:\Data\syn1\kubo\2021-0127\#2\_i\_dye2\_1.d  
Method APCI\_pos\_DIP.m  
Sample Name #2\_i\_dye2\_1  
Comment Cap 150  
Hex 400  
Temp 300

Acquisition Date 1/28/2021 4:03:59 AM

Operator BDAL@DE  
Instrument micrOTOF

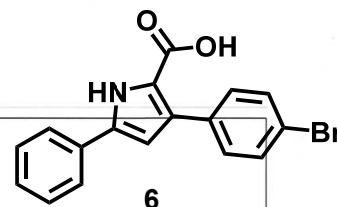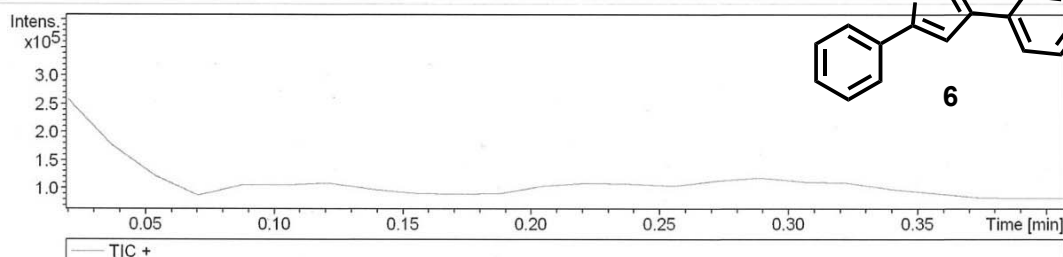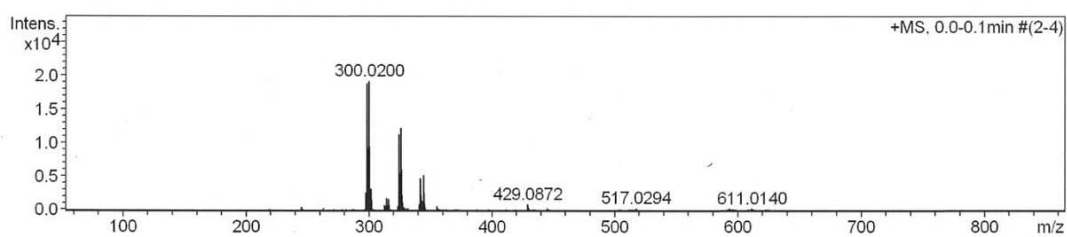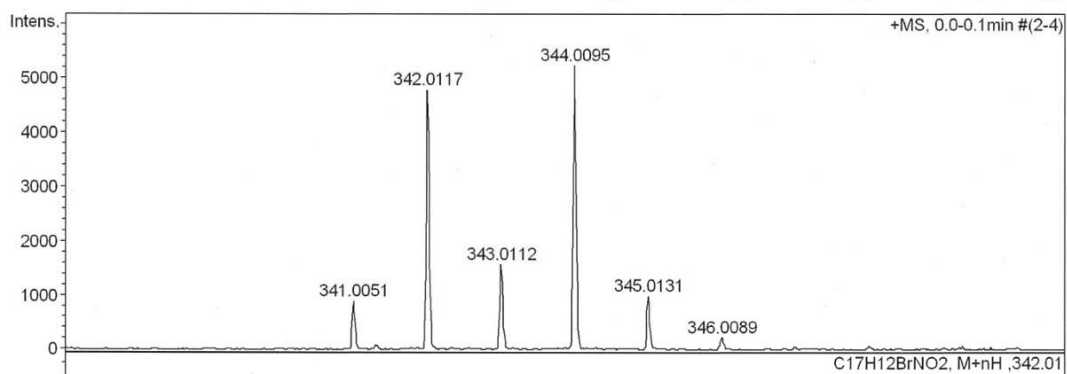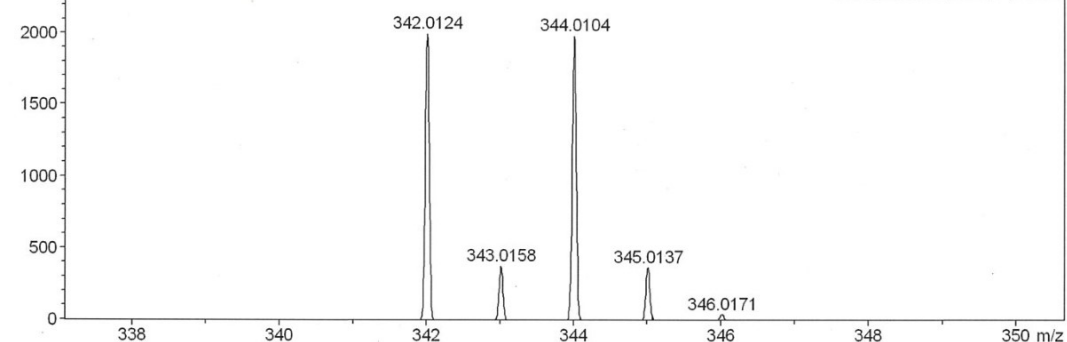

**Fig. S24.** High resolution of APCI mass spectrum (positive mode) of **6**.

# Generic Display Report

## Analysis Info

Analysis Name D:\Data\syn1\kubol2021-0127\#1\_i\_dye1\_2.d  
Method APCI\_pos\_DIP.m  
Sample Name #1\_i\_dye1\_2  
Comment Cap 150  
Hex 400  
Temp 300

Acquisition Date 1/28/2021 3:54:12 AM

Operator BDAL@DE  
Instrument micrOTOF

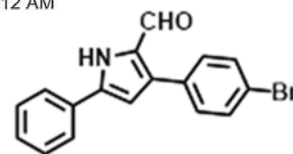

7

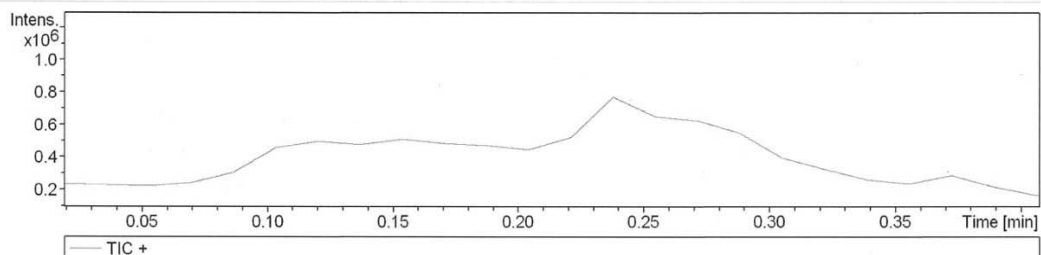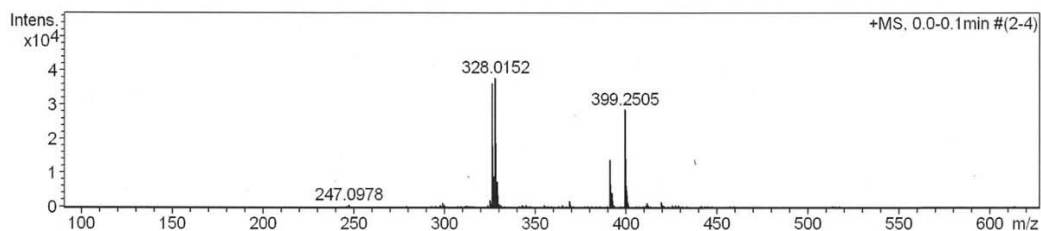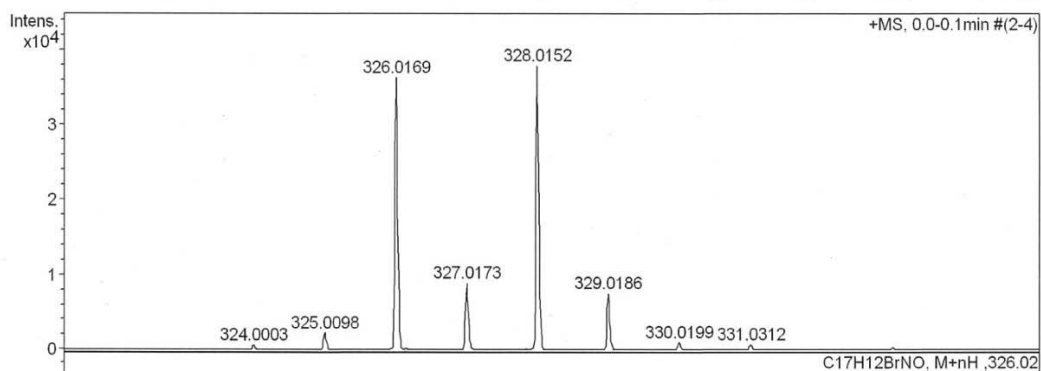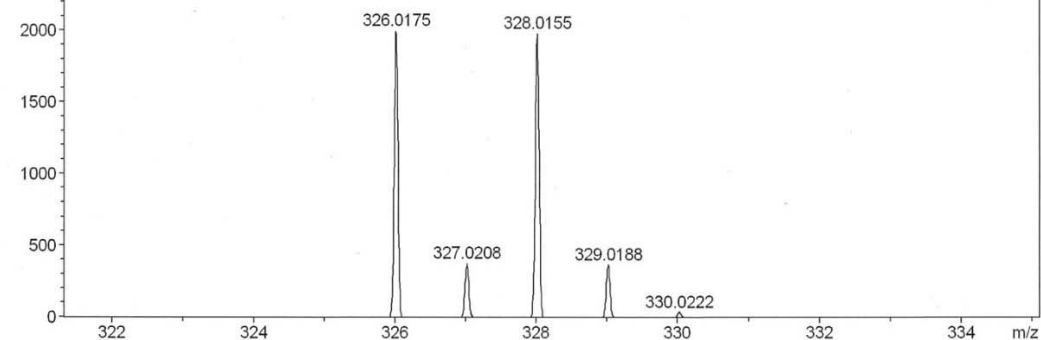

Fig. S25. High resolution of APCI mass spectrum (positive mode) of 7.



# Generic Display Report

## Analysis Info

Analysis Name D:\Data\syn1\kubo\2021-0127\#4\_i\_dye4\_1.d  
Method APCI\_pos\_DIP.m  
Sample Name #4\_i\_dye4\_1  
Comment Cap 150  
Hex 400  
Temp 300

Acquisition Date 1/28/2021 4:14:21 AM

Operator BDAL@DE  
Instrument micrOTOF

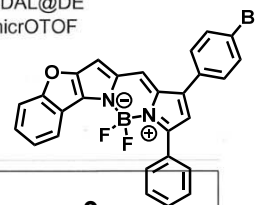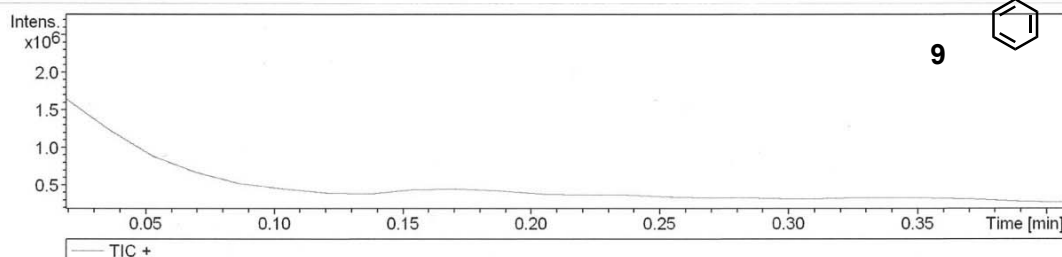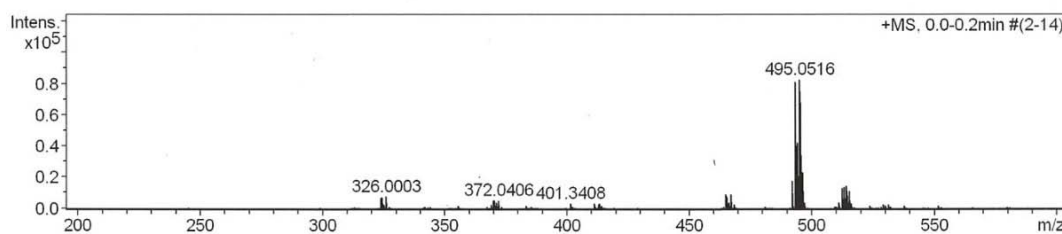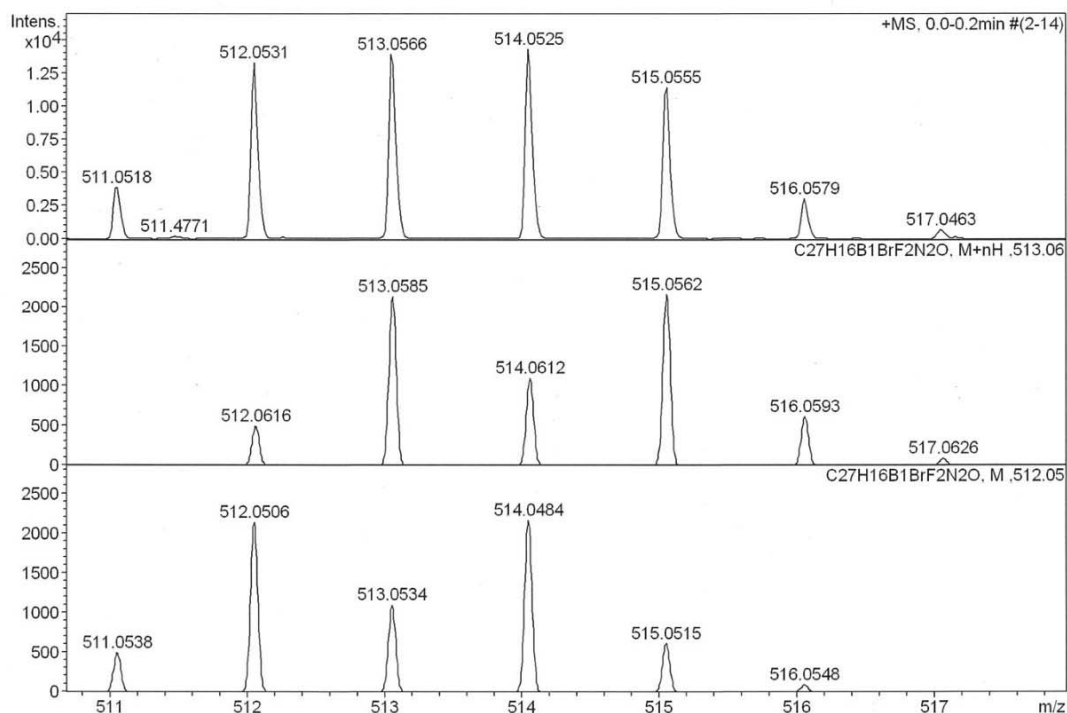

**Fig. S26.** High resolution of APCI mass spectrum (positive mode) of **9**.

# Generic Display Report

## Analysis Info

Analysis Name D:\Data\syn1\kubo\2021-0127\#5\_i\_dye5\_1.d  
Method APCI\_pos\_DIP.m  
Sample Name #5\_i\_dye5\_1  
Comment Cap 150  
Hex 400  
Temp 300

Acquisition Date 1/28/2021 4:21:38 AM

Operator BDAL@DE  
Instrument micrOTOF

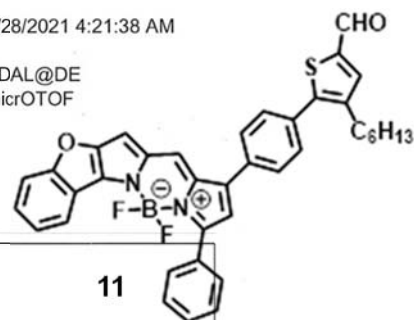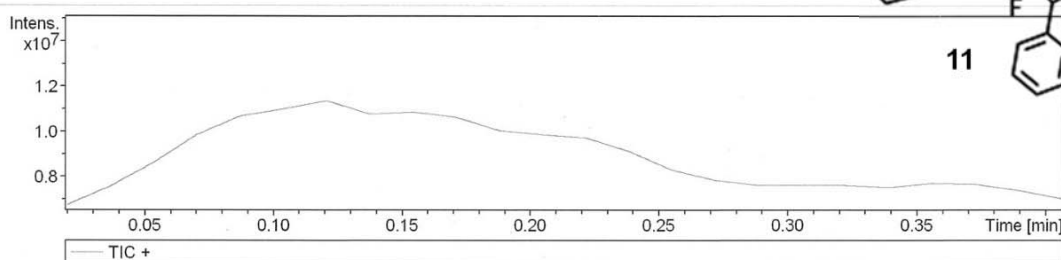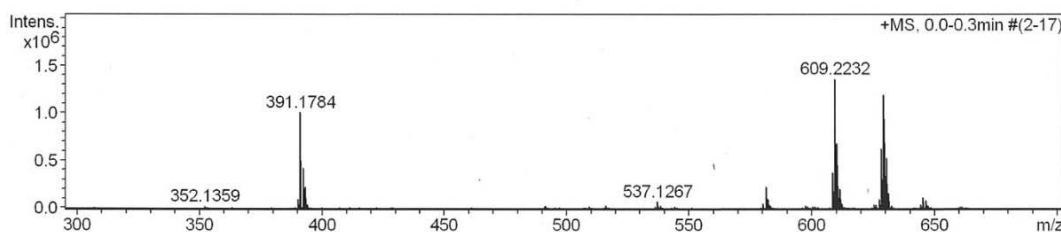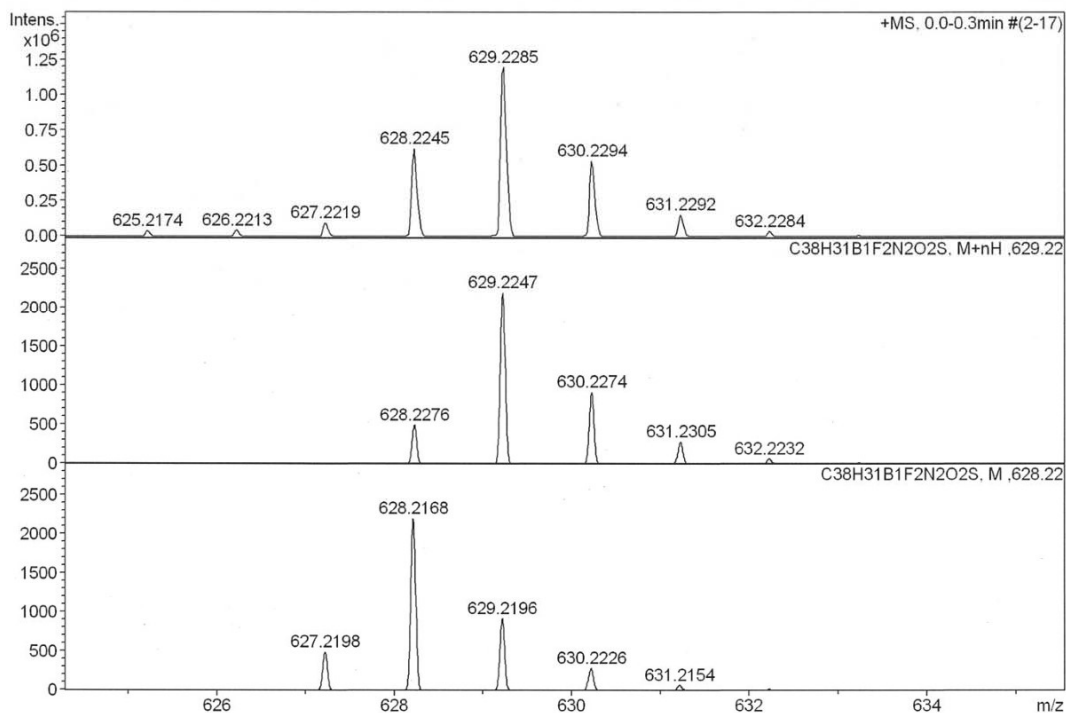

Fig. S27. High resolution of APCI mass spectrum (positive mode) of 11.

# Generic Display Report

## Analysis Info

Analysis Name D:\Data\syn1\Bo\20190628\EXP77HRMS.d  
Method esi\_neg\_wide.m  
Sample Name EXP77HRMS  
Comment hex -270  
cap 100

Acquisition Date 6/28/2019 1:41:23 PM

Operator BDAI@DE  
Instrument micrOTOF

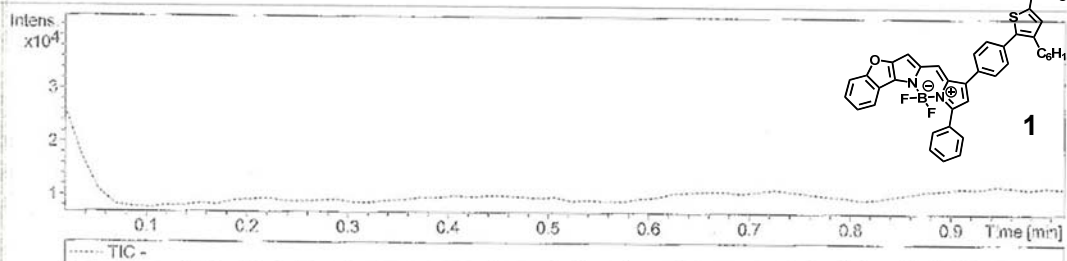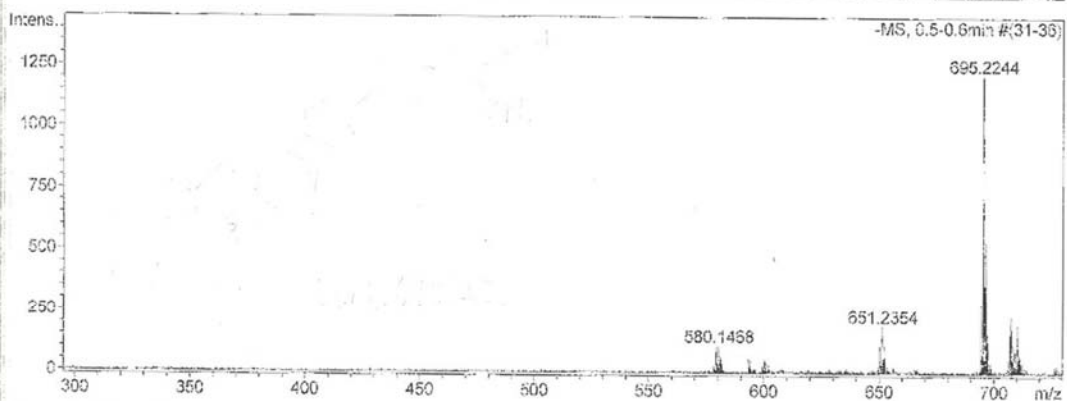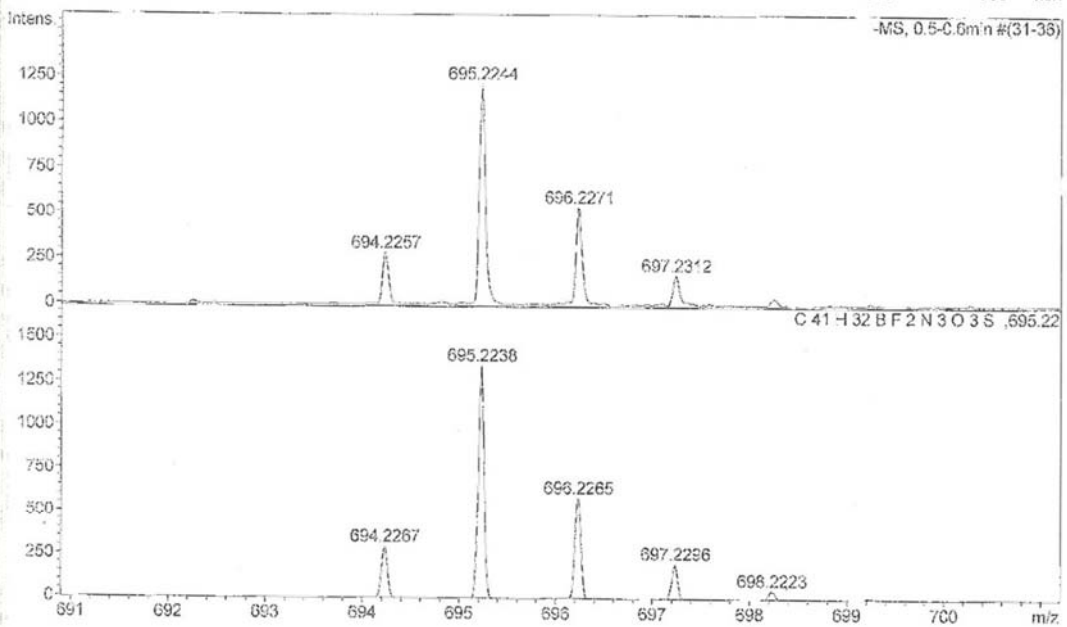

**Fig. S28.** High resolution of APCI mass spectrum (negative mode) of **1**.

## Generic Display Report

### Analysis Info

Analysis Name D:\Data\syn1\kubo\2021-0127\#6\_i\_dye6\_1.d  
Method APCI\_pos\_DIP.m  
Sample Name #6\_i\_dye6\_1  
Comment Cap 150  
Hex 400  
Temp 300

Acquisition Date 1/28/2021 4:39:23 AM

Operator BDAL@DE  
Instrument micrOTOF

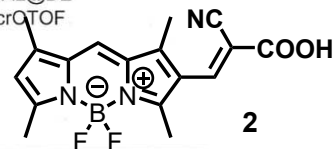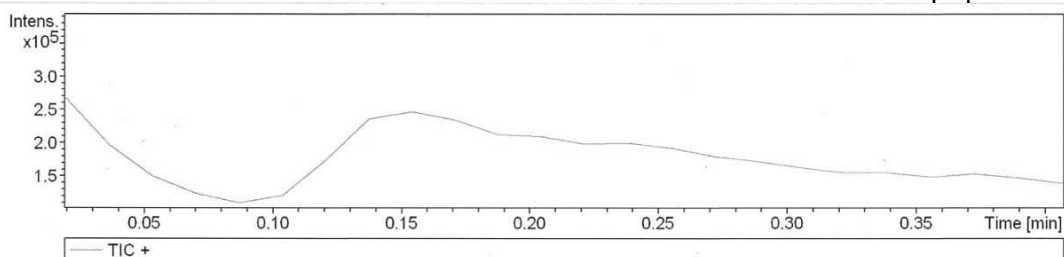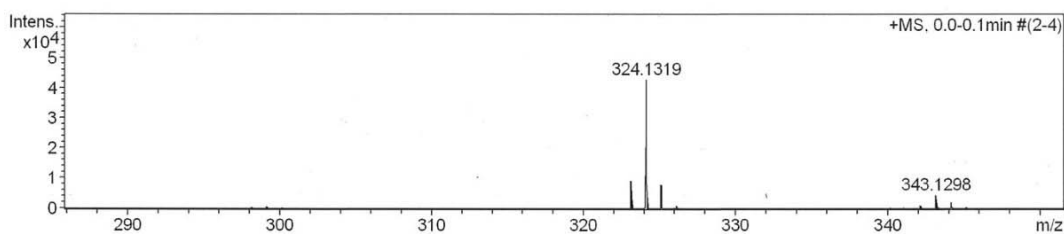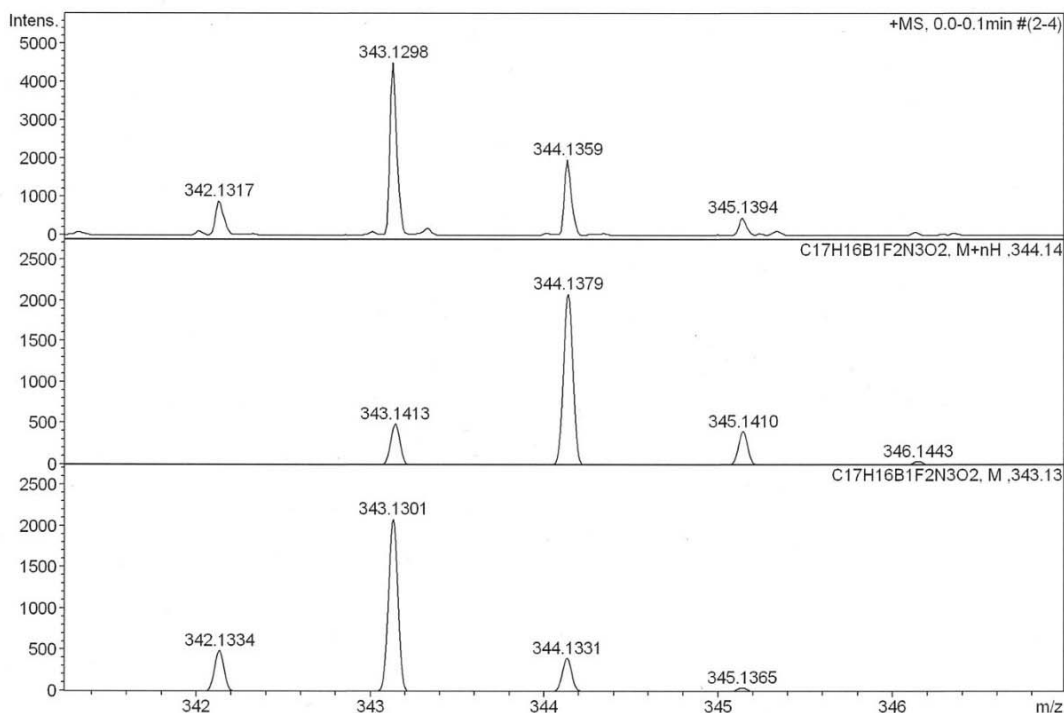

**Fig. S29.** High resolution of APCI mass spectrum (positive mode) of **2**.
